# Supplementary material for: Rare deleterious mutations of the gene EFR3A in autism spectrum disorders
Source: PubMed Central journal article supplement (PMC4032628; doi:10.1186/2040-2392-5-31), 2014-04-29
Supplement: 2040-2392-5-31-S5.pdf [file 2040-2392-5-31-S5.pdf]

|                         |                                                              |
|-------------------------|--------------------------------------------------------------|
| Cryptococcus_neoform_0  | -----                                                        |
| Drosophila_melanogas_1  | MA-----                                                      |
| EFR3A_Equus_caballus_2  | -----                                                        |
| Neurospora_crassa_3     | -----                                                        |
| Debaryomyces_hanseni_4  | -----                                                        |
| Saccharomyces_cerevi_5  | -----                                                        |
| Ustilago_maydis_6       | -----                                                        |
| Ascaris_suum_7          | -----                                                        |
| Harpegnathos_saltato_8  | -----                                                        |
| Monodelphis_domestic_9  | -----                                                        |
| Ailuropoda_melanoleu_10 | -----                                                        |
| Ashbya_gossypii_11      | -----                                                        |
| Nematostella_vectens_12 | -----                                                        |
| Acyrtosiphon_pisum_13   | -----                                                        |
| Culex_quinquefasciat_14 | -----                                                        |
| Aedes_aegypti_15        | -----                                                        |
| Camponotus_floridanu_16 | -----                                                        |
| Caenorhabditis_elega_17 | -----                                                        |
| EFR3B_Homo_sapiens_18   | -----                                                        |
| EFR3A_Homo_sapiens_19   | -----                                                        |
| EFR3B_Ailuropoda_mel_20 | MEEHVRQYKNTAGERKMTPSAGTVINGGLSRKIQMPGSTQHDDFKTSDHPLPWLGGGSY  |
| Schizosaccharomyces_21  | -----                                                        |
| EFR3A_Xenopus_laevis_22 | -----                                                        |
| EFR3A-Taeniopygia_gu_23 | -----                                                        |
| EFR3B_Danio_rerio_24    | -----                                                        |
| Anopheles_darlingi_25   | -----                                                        |
| EFR3B_Mus_musculus_26   | -----                                                        |
| Yarrowia_lipolytica_27  | -----                                                        |
| EFR3A_Rattus_norvegi_28 | -----                                                        |
| Gallus_gallus_29        | -----                                                        |
| Kluyveromyces_lactis_30 | -----                                                        |
| Ornithorhynchus_anat_31 | MDGEEGHAI SQVTFWTRAGGARENAMPTLPRETLSQSDLTHRTSGVVSFGPVLVGTVLK |
| EFR3A_Oryctolagus_cu_32 | -----                                                        |
| Nasonia_vitripennis_33  | -----                                                        |
| Candida_glabrata_34     | -----                                                        |
| Ixodes_scapularis_35    | -----                                                        |
| Daphnia_pulex_36        | -----                                                        |
| Tribolium_castaneum_37  | MS-----                                                      |
| Anopheles_gambiae_38    | -----                                                        |
| EFR3B_Ciona_intestin_39 | -----                                                        |
| Tetraodon_nigrovirid_40 | -----                                                        |
| Solenopsis_invicta_41   | -----                                                        |
|                         |                                                              |
| Cryptococcus_neoform_0  | -----                                                        |
| Drosophila_melanogas_1  | -----LIRCCFEPPELPEFFDSFVKCTDPSC-                             |
| EFR3A_Equus_caballus_2  | -----MPTR-                                                   |
| Neurospora_crassa_3     | -----                                                        |
| Debaryomyces_hanseni_4  | -----                                                        |
| Saccharomyces_cerevi_5  | -----                                                        |
| Ustilago_maydis_6       | -----MDG-                                                    |
| Ascaris_suum_7          | -----                                                        |
| Harpegnathos_saltato_8  | -----                                                        |
| Monodelphis_domestic_9  | -----MSRGGHNMTRG-                                            |
| Ailuropoda_melanoleu_10 | -----MKDYIQVPAAE LDKPYELPSTRESTAFLWLSRNSNDFILLVLMFTR-        |
| Ashbya_gossypii_11      | -----                                                        |
| Nematostella_vectens_12 | -----MATSH-                                                  |
| Acyrtosiphon_pisum_13   | -----M-                                                      |
| Culex_quinquefasciat_14 | -----MSIIKCCFEPVEMPEFLDSFVKKCTEGC-                           |
| Aedes_aegypti_15        | -----MSMIRCCFEPVEMPEFLDSFVKKCTEGC-                           |
| Camponotus_floridanu_16 | -----MFG-                                                    |
| Caenorhabditis_elega_17 | -----MNG-                                                    |
| EFR3B_Homo_sapiens_18   | -----MYG-                                                    |
| EFR3A_Homo_sapiens_19   | -----MPTR-                                                   |
| EFR3B_Ailuropoda_mel_20 | QGDRSVQETASGKRAKEKETGLQSVGVAGTPMLLADKGSEEIGKEEQTRKKHQDVMPWGL |
| Schizosaccharomyces_21  | -----                                                        |

|                         |                                                              |
|-------------------------|--------------------------------------------------------------|
| EFR3A_Xenopus_laevis_22 | -----MPAG-                                                   |
| EFR3A-Taeniopygia_gu_23 | -----MRQYVQVPTAEQEKAYDYNSAFEPRSCMCLG-                        |
| EFR3B_Danio_rerio_24    | -----MTG-                                                    |
| Anopheles_darlingi_25   | -----MSMIKCCFEPELEMPEFLDSFVKKCTEGC-                          |
| EFR3B_Mus_musculus_26   | -----MYG-                                                    |
| Yarrowia_lipolytica_27  | -----                                                        |
| EFR3A_Rattus_norvegi_28 | -----MPTR-                                                   |
| Gallus_gallus_29        | -----MGRKG-                                                  |
| Kluyveromyces_lactis_30 | -----                                                        |
| Ornithorhynchus_anat_31 | AAFNIIITGGVAVANGRGRPRGLVQLGKAGWACQGPSPRPLHRPPAAPGFGLGQAPSRL  |
| EFR3A_Oryctolagus_cu_32 | -----MKDYVQVPAAELEKPYEFTSRESTTFLYPMIMKNITSVLLVTDRCG-         |
| Nasonia_vitripennis_33  | -----MALIRCCFEAEAPDIFESVVGKCTDPGC-                           |
| Candida_glabrata_34     | -----MQLG-                                                   |
| Ixodes_scapularis_35    | -----IAG-                                                    |
| Daphnia_pulex_36        | -----MSVWSTLSDSSFLEMLDVLKSKCDASYC-                           |
| Tribolium_castaneum_37  | -----FIKCCFDGIEIAEVLDTFAQKCTDPGC-                            |
| Anopheles_gambiae_38    | -----MLG-                                                    |
| EFR3B_Ciona_intestin_39 | -----                                                        |
| Tetraodon_nigrovirid_40 | -----                                                        |
| Solenopsis_invicta_41   | -----G-                                                      |
|                         |                                                              |
| Cryptococcus_neoform_0  | -----                                                        |
| Drosophila_melanog_1    | -----                                                        |
| EFR3A_Equus_caballus_2  | -----                                                        |
| Neurospora_crassa_3     | -----                                                        |
| Debaryomyces_hanseni_4  | -----                                                        |
| Saccharomyces_cerevi_5  | -----                                                        |
| Ustilago_maydis_6       | -----                                                        |
| Ascaris_suum_7          | -----                                                        |
| Harpegnathos_saltato_8  | -----                                                        |
| Monodelphis_domestic_9  | -----                                                        |
| Ailuropoda_melanoleu_10 | -----                                                        |
| Ashbya_gossypii_11      | -----                                                        |
| Nematostella_vectens_12 | -----                                                        |
| Acyrtosiphon_pisum_13   | -----                                                        |
| Culex_quinquefasciat_14 | -----                                                        |
| Aedes_aegypti_15        | -----                                                        |
| Camponotus_floridanu_16 | -----                                                        |
| Caenorhabditis_elega_17 | -----                                                        |
| EFR3B_Homo_sapiens_18   | -----                                                        |
| EFR3A_Homo_sapiens_19   | -----                                                        |
| EFR3B_Ailuropoda_mel_20 | ECDWFSPGMGSSRFCAGRGMFQEEACELEKEALEQKG-----                   |
| Schizosaccharomyces_21  | -----                                                        |
| EFR3A_Xenopus_laevis_22 | -----                                                        |
| EFR3A-Taeniopygia_gu_23 | -----                                                        |
| EFR3B_Danio_rerio_24    | -----                                                        |
| Anopheles_darlingi_25   | -----                                                        |
| EFR3B_Mus_musculus_26   | -----                                                        |
| Yarrowia_lipolytica_27  | -----                                                        |
| EFR3A_Rattus_norvegi_28 | -----                                                        |
| Gallus_gallus_29        | -----                                                        |
| Kluyveromyces_lactis_30 | -----                                                        |
| Ornithorhynchus_anat_31 | TGSLRRSSAGPWLTPGRALPCAQYFGRLAELKQLPLNQVPQNSSDECLLCTEHWGNGWML |
| EFR3A_Oryctolagus_cu_32 | -----                                                        |
| Nasonia_vitripennis_33  | -----                                                        |
| Candida_glabrata_34     | -----                                                        |
| Ixodes_scapularis_35    | -----                                                        |
| Daphnia_pulex_36        | -----                                                        |
| Tribolium_castaneum_37  | -----                                                        |
| Anopheles_gambiae_38    | -----                                                        |
| EFR3B_Ciona_intestin_39 | -----                                                        |
| Tetraodon_nigrovirid_40 | -----                                                        |
| Solenopsis_invicta_41   | -----                                                        |
|                         |                                                              |
| Cryptococcus_neoform_0  | -----                                                        |

|                          |                                                                 |
|--------------------------|-----------------------------------------------------------------|
| Drosophila_melanogas_1   | -----                                                           |
| EFR3A_Equus_caballus_2   | -----                                                           |
| Neurospora_crassa_3      | -----                                                           |
| Debaryomyces_hanseni_4   | -----                                                           |
| Saccharomyces_cerevi_5   | -----                                                           |
| Ustilago_maydis_6        | -----                                                           |
| Ascaris_suum_7           | -----                                                           |
| Harpegnathos_saltato_8   | -----                                                           |
| Monodelphis_domestic_9   | -----                                                           |
| Ailuropoda_melanoleu_10  | -----                                                           |
| Ashbya_gossypii_11       | -----                                                           |
| Nematostella_vectens_12  | -----                                                           |
| Acyrtosiphon_pisum_13    | -----                                                           |
| Culex_quinquefasciat_14  | -----                                                           |
| Aedes_aegypti_15         | -----                                                           |
| Camponotus_floridanu_16  | -----                                                           |
| Caenorhabditis_elega_17  | -----                                                           |
| EFR3B_Homo_sapiens_18    | -----                                                           |
| EFR3A_Homo_sapiens_19    | -----                                                           |
| EFR3B_Ailuropoda_mel_20  | -----                                                           |
| Schizosaccharomyces_21   | -----                                                           |
| EFR3A_Xenopus_laervis_22 | -----                                                           |
| EFR3A-Taeniopygia_gu_23  | -----                                                           |
| EFR3B_Danio_rerio_24     | -----                                                           |
| Anopheles_darlingi_25    | -----                                                           |
| EFR3B_Mus_musculus_26    | -----                                                           |
| Yarrowia_lipolytica_27   | -----                                                           |
| EFR3A_Rattus_norvegi_28  | -----                                                           |
| Gallus_gallus_29         | -----                                                           |
| Kluyveromyces_lactis_30  | -----                                                           |
| Ornithorhynchus_anat_31  | VAVRIASRTVDVIPVKVIWGDPNHEELLSSTNAAYLLLLLGGRECSHVRSRKQLDKLPEHEVT |
| EFR3A_Oryctolagus_cu_32  | -----                                                           |
| Nasonia_vitripennis_33   | -----                                                           |
| Candida_glabrata_34      | -----                                                           |
| Ixodes_scapularis_35     | -----                                                           |
| Daphnia_pulex_36         | -----                                                           |
| Tribolium_castaneum_37   | -----                                                           |
| Anopheles_gambiae_38     | -----                                                           |
| EFR3B_Ciona_intestin_39  | -----                                                           |
| Tetraodon_nigrovirid_40  | -----                                                           |
| Solenopsis_invicta_41    | -----                                                           |
|                          |                                                                 |
| Cryptococcus_neoform_0   | -----MGCI PCR-TLQP---EVAHLNACYPPP KALLTAGPEYR                   |
| Drosophila_melanogas_1   | -----CCGCCSALRPRYKR---LV---DNIFP-----VNPEDG                     |
| EFR3A_Equus_caballus_2   | -----VCCCSALRPRYKR---LV---DNIFP-----EDPKDG                      |
| Neurospora_crassa_3      | -----MNALQQKCRPKHQVLV---LKCYPRTIK---GAVDVK                      |
| Debaryomyces_hanseni_4   | -----MPIFRPKHQK---LI---LQCYPPG---KGVDKK                         |
| Saccharomyces_cerevi_5   | -----MQLSMRMMFTPKHQK---LV---NQCYPTG---RTDCK                     |
| Ustilago_maydis_6        | -----MC--IPKSNHKK---LV---DDCYPPP KALITSAPEYR                    |
| Ascaris_suum_7           | -----LMFCCAPCKPRYRR---LV---DAIYP-----RSLTEG                     |
| Harpegnathos_saltato_8   | -----CCWCCSALRPRYKR---LV---DNIFP-----VNPQDG                     |
| Monodelphis_domestic_9   | -----GRICCCGALRPRFKR---LV---DNIFP-----EDPKDG                    |
| Ailuropoda_melanoleu_10  | -----VCCCSALRPRYKR---LV---DNIFP-----EDPKDG                      |
| Ashbya_gossypii_11       | -----MGLLFTPKHQK---LV---NQCYPTG---RTPDKK                        |
| Nematostella_vectens_12  | -----ICSCFGNFGPRYKR---LV---DNIFP-----ADARSG                     |
| Acyrtosiphon_pisum_13    | -----CVGCLSRMRPRYKR---LV---DNIFP-----SVPQDG                     |
| Culex_quinquefasciat_14  | -----CCGCCSALRPRYKR---LV---DNIFP-----VNPEDG                     |
| Aedes_aegypti_15         | -----CCGCCSALRPRYKR---LV---DNIFP-----VNPEDG                     |
| Camponotus_floridanu_16  | -----CCWCCSALRPRYKR---LV---DNIFP-----VNPQDG                     |
| Caenorhabditis_elega_17  | -----LC-CCTPCKPRYRR---LV---DSIYP-----RAVTDG                     |
| EFR3B_Homo_sapiens_18    | -----VCGCCGALRPRYKR---LV---DNIFP-----EDPEDG                     |
| EFR3A_Homo_sapiens_19    | -----VCCCSALRPRYKR---LV---DNIFP-----EDPKDG                      |
| EFR3B_Ailuropoda_mel_20  | -----GRVCGCCGALRPRYKR---LV---DNIFP-----EDPEDG                   |
| Schizosaccharomyces_21   | -----MWLFRSKHKK---LV---LRCFPPSG-----KLGETE                      |
| EFR3A_Xenopus_laervis_22 | -----ICGCCGALRPRYKR---LV---DNIFP-----EDPRDG                     |

EFR3A\_Taeniopygia\_gu\_23  
EFR3B\_Danio\_rerio\_24  
Anopheles\_darlingi\_25  
EFR3B\_Mus\_musculus\_26  
Yarrowia\_lipolytica\_27  
EFR3A\_Rattus\_norvegi\_28  
Gallus\_gallus\_29  
Kluyveromyces\_lactis\_30  
Ornithorhynchus\_anat\_31  
EFR3A\_Oryctolagus\_cu\_32  
Nasonia\_vitripennis\_33  
Candida\_glabrata\_34  
Ixodes\_scapularis\_35  
Daphnia\_pulex\_36  
Tribolium\_castaneum\_37  
Anopheles\_gambiae\_38  
EFR3B\_Ciona\_intestin\_39  
Tetraodon\_nigrovirid\_40  
Solenopsis\_invicta\_41

Cryptococcus\_neoform\_0  
Drosophila\_melanog\_1  
EFR3A\_Equus\_caballus\_2  
Neurospora\_crassa\_3  
Debaryomyces\_hanseni\_4  
Saccharomyces\_cerevi\_5  
Ustilago\_maydis\_6  
Ascaris\_suum\_7  
Harpegnathos\_saltato\_8  
Monodelphis\_domestic\_9  
Ailuropoda\_melanoleu\_10  
Ashbya\_gossypii\_11  
Nematostella\_vectens\_12  
Acyrtosiphon\_pisum\_13  
Culex\_quinquefasciat\_14  
Aedes\_aegypti\_15  
Camponotus\_floridanu\_16  
Caenorhabditis\_elega\_17  
EFR3B\_Homo\_sapiens\_18  
EFR3A\_Homo\_sapiens\_19  
EFR3B\_Ailuropoda\_mel\_20  
Schizosaccharomyces\_21  
EFR3A\_Xenopus\_laevis\_22  
EFR3A\_Taeniopygia\_gu\_23  
EFR3B\_Danio\_rerio\_24  
Anopheles\_darlingi\_25  
EFR3B\_Mus\_musculus\_26  
Yarrowia\_lipolytica\_27  
EFR3A\_Rattus\_norvegi\_28  
Gallus\_gallus\_29  
Kluyveromyces\_lactis\_30  
Ornithorhynchus\_anat\_31  
EFR3A\_Oryctolagus\_cu\_32  
Nasonia\_vitripennis\_33  
Candida\_glabrata\_34  
Ixodes\_scapularis\_35  
Daphnia\_pulex\_36  
Tribolium\_castaneum\_37  
Anopheles\_gambiae\_38  
EFR3B\_Ciona\_intestin\_39  
Tetraodon\_nigrovirid\_40  
Solenopsis\_invicta\_41

Cryptococcus\_neoform\_0  
Drosophila\_melanog\_1

-----VCCCAALRPRYKR---LV---DNIFP-----EDPKDG  
-----VCGCCGALRPRYKR---LV---DNIFP-----EDPEDG  
-----CCGCCSALRPRYKR---LV---DNIFP-----ANPEDG  
-----VCGCCGALRPRYKR---LV---DNIFP-----EDPEDG  
-----MAPGIPKPRHQ---LV---LQCPDG-----QAADKK  
-----VCCCSALRPRYKR---LV---DNIFP-----EDPKDG  
-----VCCCAALRPRYKR---LV---DNIFP-----EDPKDG  
-----MGFLFTPQH---LV---NQCYPG-----RTPDKK  
REGLCHHGCRTAEKLIIPSRVCCCAALRPRYKR---LV---DNIFP-----EDPKDG  
-----VCCCSALRPRYKR---LV---DNIFP-----EDPKDG  
-----CCWCCSALRPRYKR---LV---DNIFP-----VNPQDG  
-----HIFTPKHQ---LV---NQCYPG-----RAPDKK  
-----CCGCCAALRPRYKR---LV---DNIFP-----ANPEDG  
-----CCGCCAALRPRYKR---LV---DNIFP-----VNPEDG  
-----CCGCCSAFRPRYKR---FV---DNIFP-----VYPQDG  
-----CCGCCSALRPRYKR---LV---DNIFP-----ANPEDG  
-----MSCSCFSALRPQYKR---LV---DSIYP-----ANPEDG  
-----VCGCCPLRPRYKR---LV---DNIFP-----EDPKDG  
-----CCWCCALRPRYKR---LV---DNIFP-----VNPQDG

PLAQDLSKLTYPATNKPSKLAKIGEELEKRVQESARAS---SGNHKYRASLLISLAILR  
LVKSNMEKLTIFYSLSSPDKLDRIGEYLYQKATKDIRRKR---YKL-----AEIAMEAMD  
LVKADMEKLTIFYAVSAPEKLDRIGSYLAERLSRDVVRHR---SGY-----VLIAMEALD  
PNSSELSYLLFYQCSRRRAKIQVGSFLEKKTASDVYHQ---IGN-----VQVTLQILA  
PNPSELSYLLFYASTRRVKLEKVVTFDRKTTSDAKHNR---AGN-----LQVTLTIIS  
PKSSETSLLYVNSRRRSKLEKVVSTYLIKRTSDLNHR---IGN-----IAVTLDLMN  
PNSNELGRLTYAQNPKAKLTKVGNLLESKAQADARAASGPAADKGAALMITLAITK  
LIHTNMQKLTIFYAISQPEKLDRIGEYIVWRMSRDLYRQR---YNQ-----VKISVEAMD  
LIKNNMEKLTIFYSLSSPEKLDRIGEYLFQRASRDYRRR---NGF-----VVIAMEAMD  
LVKGDMEKLTIFYAVSAPEKLDRIPTYLADKLRDVRHR---TGN-----VLIAMEALD  
LVKADMEKLTIFYAVSAPEKLDRIGSYLAERLSRDVVRHR---SGY-----VLIAMEALD  
PKSSETSLLYVNSRRRTKLEKVSAYLVKRTAADLAHR---IGN-----VMVTLELAE  
LVKANMDKLIIFYALSPEKLDRIPTYLARKLRFVDRKR---YDF-----VRISMEALD  
LVKNNMEKLTIFYALSPEKLDRIGEYLFQKASRDISRKR---NEF-----VMIAMEAMD  
LVKANMEKLTIFYSLRSPEKLDRIGEYLYQRASKDIRRKR---YKF-----VEIAMESMD  
LVKSNMEKLTIFYSLRSPEKLDRIGEYLYQRASKDIRRKR---YKF-----VEIAMEAMD  
LIKNNMEKLTIFYSLSSPEKLDRIGEYLFQRASRDYRRR---NGF-----VVIAMEAMD  
LLYSNMQKLTIFYAISHPEKLDRIGEYLVMMVRDLSRQR---PVQ-----VKIAMEAMD  
LVKTNMEKLTIFYALSPEKLDRIGAYLSERLIRDVGRHR---YGY-----VCIAMEALD  
LVKTDMEKLTIFYAVSAPEKLDRIGSYLAERLSRDVVRHR---SGY-----VLIAMEALD  
LVKTNMEKLTIFYALSPEKLDRIGAYLSERLIRDVGRHR---YGY-----VCIAMEALD  
PNGSPLAYLSYAAASNSKLRKVAHFLGSRVRSYHHR---DNE-----VIIGLKICK  
LVKADMEKLTIFYAVSAPEKLDRIGAYLAERLSRDVVRHR---YGN-----VFIAMEALD  
LVKADMEKLTIFYAVSAPEKLDRIGAYLAERLTRDVARHR---YGY-----VLIAMEALD  
LVKANMEKLTIFYALSPEKLDRIGAYLSERLIRDVGRHR---YGY-----VCIAMEALD  
LVKSNMEKLTIFYSLRSPEKLDRIGEYLYQRASKDIYRKR---YKF-----VEIAMEAMD  
LVKTNMEKLTIFYALSPEKLDRIGAYLSERLIRDVGRHR---YGY-----VCIAMEALD  
PNPSELSYLLFYVNHRRVKLEKVPFLENKCYKDVSRGR---QGN-----VMVALDIFA  
LVKADMEKLTIFYAVSAPEKLDRIGAYLAERLSRDVVRHR---SGY-----VLIAMEALD  
LVKADMEKLTIFYAVSAPEKLDRIGAYLAERLSRDVVRHR---YGY-----VLIAMEALD  
PKGSETSLLYVNSRRPKLEKVVSYLVKRSTDLNRRR---SGN-----VSVTLELLA  
LVKADMEKLTIFYAVSAPEKLDRIGSYLADRLSRDVRHR---SGY-----VLIAMEALD  
LVKADMEKLTIFYAVSAPEKLDRIGAYLAERLSRDVVRHR---SGY-----VLIAMEALD  
LIKNNMEKLMFYSLSSPEKLDRIGEYLFQRASRDISRKR---NGF-----VVIAMEAMD  
PKSSETSLLYVNSRRRSKLEKVSNYLIKRTNTDLSR---VGN-----VCVTLELMA  
LVRNNMEKLTIFYALSPEKLDRIGEYLAVRVSRDISRHR---VRY-----VEISMEAMD  
LVRSNMDKLTIFYSMSSPEKLDRIGEYLAQRVSRDIYRHR---NPM-----VVIAMEAMD  
LVKNNMEKLTIFYALSPEKLDRIGEYMYQRAARDIYRKR---YGF-----VVIAMEAMD  
LVKSNMEKLTIFYSLRSPEKLDRIGEYLYQRASKDIYRKR---YKF-----VEIAMEAMD  
LVRSEMEKLTYYAASPEKLDRIGDYLARRLTRDMARKR---EMP-----VVIAMEALN  
LSKSDMEKLTIFYAVSAPEKLDRIGEYLAKRLSHDV-----ALD  
LIKNNMEKLTIFYSLSSPEKLDRIGEYLFQRASRDYRRR---NGF-----VVIAMEAMD

ALLTECKR--DIALFARSTLRVIDSSLDVRVYQGG-----IDLEV---VGRAAAAF  
LLQACHAQTTLNLFVESFLRMVQKLE---DSNP-----NLKI---MA--TNSF

EFR3A\_Equus\_caballus\_2  
Neurospora\_crassa\_3  
Debaryomyces\_hanseni\_4  
Saccharomyces\_cerevi\_5  
Ustilago\_maydis\_6  
Ascaris\_suum\_7  
Harpegnathos\_saltato\_8  
Monodelphis\_domestic\_9  
Ailuropoda\_melanoleu\_10  
Ashbya\_gossypii\_11  
Nematostella\_vectens\_12  
Acyrtosiphon\_pisum\_13  
Culex\_quinquefasciat\_14  
Aedes\_aegypti\_15  
Camponotus\_floridanu\_16  
Caenorhabditis\_elega\_17  
EFR3B\_Homo\_sapiens\_18  
EFR3A\_Homo\_sapiens\_19  
EFR3B\_Ailuropoda\_mel\_20  
Schizosaccharomyces\_21  
EFR3A\_Xenopus\_laevis\_22  
EFR3A-Taeniopygia\_gu\_23  
EFR3B\_Danio\_rerio\_24  
Anopheles\_darlingi\_25  
EFR3B\_Mus\_musculus\_26  
Yarrowia\_lipolytica\_27  
EFR3A\_Rattus\_norvegi\_28  
Gallus\_gallus\_29  
Kluyveromyces\_lactis\_30  
Ornithorhynchus\_anat\_31  
EFR3A\_Oryctolagus\_cu\_32  
Nasonia\_vitripennis\_33  
Candida\_glabrata\_34  
Ixodes\_scapularis\_35  
Daphnia\_pulex\_36  
Tribolium\_castaneum\_37  
Anopheles\_gambiae\_38  
EFR3B\_Ciona\_intestin\_39  
Tetraodon\_nigrovirid\_40  
Solenopsis\_invicta\_41

QLLMACHSQ-SIKPFVESFLHMVAKLLE----SGEP-----KLQV----LG--TNSF  
ALIEKSPK--DLPLFASCVLISILEQVLK----SSDI-----TMVE----SS--IPTF  
SLIEECSE--NLNVFASFVCSILKSVLQ----SKDL-----SLCK----HA--IQTY  
KIVLHCKE--NLNVFVKDFLYIMNKVLSNNNFNDV-----SVVE----LI--ELAF  
NLLTECKN--SLNYFIKPSQSI IAAALD----AAQPTSARPRDLEISA----RA--ASAF  
QLLQSCHDLSSLNQFIESFLKMLQKLE----TNNF-----QMEK----LA--TDSF  
QLLVACHAQ-TLNLFIIESFLKMQKLE----STDP-----QLQI----LA--TQSF  
QLLMACHSQ-SIKPFVESFLHMVAKLLE----SGEP-----ELQM----LG--TNSF  
QLLMACHSQ-SIKPFVESFLHMVAKLLE----SGEP-----KLQV----LG--TNSF  
KIVTSCKE--NLNVFVKDFLDIMIKTLS----NNNF-----NLDVVCVVEAA--EAVF  
LLMACHAP-SLNLFVESFLRMVQKLE----SPEA-----ELQV----LG--TSSF  
QLLVACHAQ-TLNLFVESYLRIVQKLE----SSEP-----SLQI----LA--TQSF  
LLMACHAQ-IILNFVESFLRMVQKLE----DTNP-----TLQI----MA--TNSF  
LLMACHAQ-IILNFVESFLRMVQKLE----DVNP-----TLQI----MA--TNSF  
QLLVACHAQ-TLNLFIIESFLKMQKLE----STDP-----QLQI----LA--TQSF  
QLLQACHSSPSLPQFSENHLRMVQRLE----SNNA-----KMEQ----LA--TDSF  
QLLMACHCQ-SINLFVESFLKMQKLE----SEKP-----NLQI----LG--TNSF  
QLLMACHSQ-SIKPFVESFLHMVAKLLE----SGEP-----KLQV----LG--TNSF  
QLLMACHCQ-SINLFVESFLKMQKLE----SEKP-----NLQI----LG--TNSF  
TLVQKCRD--NINVMASEVVNML--LVA----SSSK-----NLEV----LSACVDCF  
QLLMACHSQ-SIKPFVESFLHMVAKLLE----SGEP-----KLQI----YG--TNSF  
QLLMACHSQ-SIKPFVESFLHMVAKLLE----SGEP-----KLQV----LG--TNSF  
QLLMACHCQ-SINLFVESFLKMQKLE----ADKP-----NLQI----LG--TNSF  
LLMACHAQ-IILNFVESFLRMVQKLE----DTNP-----TLQI----MA--TNSF  
QLLMACHCQ-SINLFVESFLKMQKLE----SEKP-----NLQI----LG--TNSF  
KLIEECHE--DLNLFAQNVVNTLLDVVN----SGDL-----LLCQ----HS--NKVF  
QLLMACHSQ-SIKPFVESFLHMVAKLLE----SGEP-----KLQV----LG--TNSF  
QLLMACHSQ-SIKPFVESFLHMVAKLLE----SGEP-----KLQV----LG--TNSF  
KIVENCNE--NMNFIKDFIHMVTLVNNNFNDP-----TIVG----LI--ERVL  
QLLMACHSQ-SIKPFVESFLHMVAKLLE----SGEP-----KLQV----LG--TNSF  
QLLMACHSQ-SIKPFVESFLHMVAKLLE----SGEP-----KLQV----LG--TNSF  
QLLAACHAQ-TLNLFVESFLKMQKLE----STDP-----QLQI----LA--TQSF  
KIVDHCKE--NLNVFVKDFLTLNMVLTNNSINNDV-----TVIE----LL--EITF  
QLLVACHAQ-SLNLFVESFLKMQKLE----CHNA-----DLQL----LA--TQSF  
QLLLACHAQ-SLNLFVESFLKTVQKLE----TTEP-----ALQI----LA--SQSF  
QLLLACHAP-ALNLFVESFLKMQKLE----STEP-----ELQI----LA--TQSF  
LLMACHAQ-IILNFVESFLRMVQKLE----DTNP-----TLQI----MA--TNSF  
QLLLACHAQ-QINLFVESFLKMQKLE----SDNP-----EFLT----LG--TNSF  
QLLMACHSQ-SIKPFVESFLHMVAKLLE----SREP-----DLQV----LG--TNSF  
QLLVACHAQ-TLNLFVESFLKMQKLE----STDP-----QLQI----LA--TQSF

Cryptococcus\_neoform\_0  
Drosophila\_melanogas\_1  
EFR3A\_Equus\_caballus\_2  
Neurospora\_crassa\_3  
Debaryomyces\_hanseni\_4  
Saccharomyces\_cerevi\_5  
Ustilago\_maydis\_6  
Ascaris\_suum\_7  
Harpegnathos\_saltato\_8  
Monodelphis\_domestic\_9  
Ailuropoda\_melanoleu\_10  
Ashbya\_gossypii\_11  
Nematostella\_vectens\_12  
Acyrtosiphon\_pisum\_13  
Culex\_quinquefasciat\_14  
Aedes\_aegypti\_15  
Camponotus\_floridanu\_16  
Caenorhabditis\_elega\_17  
EFR3B\_Homo\_sapiens\_18  
EFR3A\_Homo\_sapiens\_19  
EFR3B\_Ailuropoda\_mel\_20  
Schizosaccharomyces\_21  
EFR3A\_Xenopus\_laevis\_22  
EFR3A-Taeniopygia\_gu\_23

IAYT-TYTDGSAVGVDVT----LTKTYFEILRKFGSMATVSL-LDSSEKPDTE-----  
VKFA-NIN----EDTPS----YHRRYDFVSKFSSMCHS-----DAASMRD-----  
VKFA-NIE----EDTPS----YHRRYDFVSRFSAMCHSCH-----SDPEIRT-----  
QAFQ-ENHDPTSLAADQA----YFRQYVSVVQYASLSTR-----PAPGAQ-----  
GVLC-SKLDGGLFSGDKV----FVDSFGSLSQNLINIGSENSKRRGPNLEWQMI----  
SSICQNLD-DVLCNGDME----FVQLYQNFVDFKIVTERI-----HNDML-----  
YALASFLD----PASSV----VDEGFQRLRSFALLAVERPLGADATLGEDAE-----  
VNFA-NIE----ENTPA----YHRQYDFVSKFAAMCHSNQ----GEDAK-----  
VRFA-NIE----EDTPS----YHTRYDFVSKYSAMCHSNN-----DDPAIRK-----  
VKFA-NIE----EDTPS----YHRRYDFVSRFSMCHSCY-----DDPEVQR-----  
VKFA-NIE----EDTPS----YHRRYDFVSRFSAMCHSCH-----SDPEIRT-----  
SSIC-QHLDGVLCSNDLE----FTQMYRSFVDVYQVVTERTL-----HNDE-----  
VKFA-NIE----EDTPS----YHRRYDFVSKFSAWCWNDN-----ENQKHRQ-----  
VRFS-NIE----EDTPS----YHRRYDFVSKFSSMCHNNN-----PNLVTME-----  
VRFA-NIE----EDTPS----YHRRYDFVSKFSSMCMYGN-----DDLELRD-----  
VRFA-NIE----EDTPS----YHRRYDFVSKFSSMCMYGN-----DDLELRD-----  
VRFA-NIE----EDTPS----YHTRYDFVSKYSAMCHSNN-----DDSIIRK-----  
VTFS-NIE----ESSPS----YHRQYDFVSKFQMCCHANPQAAYGDDFR-----  
VKFA-NIE----EDTPS----YHRSYDFVSRFSEMCHSSH-----DDLEIKT-----  
VKFA-NIE----EDTPS----YHRRYDFVSRFSAMCHSCH-----SDPEIRT-----  
VKFA-NIE----EDTPS----YHRSYDFVSRFSEMCHSSH-----DDMEIKT-----  
ATFCDNSG----KGSPTFGNEFHSAFNLLVNSFFELSKGID----CVDPQ-----  
VKFA-NIE----EDTPS----YHRRYDFVSRFSAMCHSCH-----DDPEVRK-----  
VKFA-NIE----EDTPS----YHRRYDFVSRFSAMCHSCD-----PDPEIQN-----

EFR3B\_Danio\_rerio\_24  
Anopheles\_darlingi\_25  
EFR3B\_Mus\_musculus\_26  
Yarrowia\_lipolytica\_27  
EFR3A\_Rattus\_norvegi\_28  
Gallus\_gallus\_29  
Kluyveromyces\_lactis\_30  
Ornithorhynchus\_anat\_31  
EFR3A\_Oryctolagus\_cu\_32  
Nasonia\_vitripennis\_33  
Candida\_glabrata\_34  
Ixodes\_scapularis\_35  
Daphnia\_pulex\_36  
Tribolium\_castaneum\_37  
Anopheles\_gambiae\_38  
EFR3B\_Ciona\_intestin\_39  
Tetraodon\_nigrovirid\_40  
Solenopsis\_invicta\_41

VKFA-NIE----EDTPS----YHRSYDFVSRFSEMCHSGY----EDPDIRT-----  
VRFA-NIE----EDTPS----YHRRYDFFIKFSMCMYGNM----DDVELRD-----  
VKFA-NIE----EDTPS----YHRSYDFVSRFSEMCHSSH----DDLLEIKT-----  
ALFC-QYHDGGLFLGDPE----FVRSFKQLLEVYVNMMAKVPN----GPNVQW-----  
VKFA-NIE----EDTPS----YHRRYDFVSRFSAAMCHSCH----SDPEIRT-----  
VKFA-NIE----EDTPS----YHRRYDFVSRFSAAMCHSCH----SDPEIRT-----  
EAIC-NHLGSLVSGDSE----FLELFKNFVTLYFKVANTKL----NDTDLV-----  
VKFA-NIE----EDTPS----YHRRYDFVSRFSAAMCHSCH----ADPETRT-----  
VKFA-NIE----EDTPS----YHRRYDFVSRFSAAMCHSCH----SDPEIRT-----  
VRFA-NIE----EDTPS----YHTRYDFVSKYSSMCHSNN----DDSTVRK-----  
GTICRNLG-GAYYGGTE----FIKMFKSFVDLLFEVVSRL-----NND-----  
VKFA-NIE----EDTPS----YHRRYDFVSKFSSLCHDNN----PDAELRK-----  
VKFA-NIE----EDTPS----YHRRYDFVSKFASLCHSNH----PEVDVLN-----  
VKFA-NIE----EDTPS----YHRRYDFVSKFSAAMCHSSE----GD-----  
VRFA-NIE----EDTPS----YHRRYDFFIKFSMCMYGNM----DDMELRD-----  
EKFS-EIK----EDTAS----YHRRYDFVSKFSAAMCHSQQ----KNSAIRQ-----  
VKFA-NIE----EDTPS----YHRRYDFVSKFSAAMCHSTH----EDPETMTRSGLR  
VRFA-NIE----EDTPS----YHTRYDFVSKYSAAMCHSSN----DDPTTRK-----

Cryptococcus\_neoform\_0  
Drosophila\_melanogaster\_1  
EFR3A\_Equus\_caballus\_2  
Neurospora\_crassa\_3  
Debaryomyces\_hanseni\_4  
Saccharomyces\_cerevisiae\_5  
Ustilago\_maydis\_6  
Ascaris\_suum\_7  
Harpegnathos\_saltator\_8  
Monodelphis\_domestica\_9  
Ailuropoda\_melanocephala\_10  
Ashbya\_gossypii\_11  
Nematostella\_vectens\_12  
Acyrtosiphon\_pisum\_13  
Culex\_quinquefasciatus\_14  
Aedes\_aegypti\_15  
Camponotus\_floridanus\_16  
Caenorhabditis\_elegans\_17  
EFR3B\_Homo\_sapiens\_18  
EFR3A\_Homo\_sapiens\_19  
EFR3B\_Ailuropoda\_melanocephala\_20  
Schizosaccharomyces\_21  
EFR3A\_Xenopus\_laevis\_22  
EFR3A-Taeniopygia\_guineensis\_23  
EFR3B\_Danio\_rerio\_24  
Anopheles\_darlingi\_25  
EFR3B\_Mus\_musculus\_26  
Yarrowia\_lipolytica\_27  
EFR3A\_Rattus\_norvegi\_28  
Gallus\_gallus\_29  
Kluyveromyces\_lactis\_30  
Ornithorhynchus\_anat\_31  
EFR3A\_Oryctolagus\_cu\_32  
Nasonia\_vitripennis\_33  
Candida\_glabrata\_34  
Ixodes\_scapularis\_35  
Daphnia\_pulex\_36  
Tribolium\_castaneum\_37  
Anopheles\_gambiae\_38  
EFR3B\_Ciona\_intestin\_39  
Tetraodon\_nigrovirid\_40  
Solenopsis\_invicta\_41

-----QNRTRLI---ALAGLNGAA---TSDAIFASTRDFPRQIDLI  
-----SLRLAGIK---GLQGVIRKT---VSDDLVEN-IWEAEHMEKI  
-----EIRIAGIR---GIQGVVVRT---VNDELQAT-IWEPQHMCKI  
-----HSPKIALRWRNAGLEAIRSVA---SSDALSSM---VARQYDIL  
-----SLMTCRY-----ISNCLGYNSKFSKFKFIEIC  
-----LKCIDIS---NTNSVSSN-PQLNHVFSKS  
-----QNRTRLI---GLGALAGAV---ASDAIYSS-NFK-QLLSLL  
-----AIRYAGLR---GLRGVLWKS---ATDPLQAS-IWEKQHMCKI  
-----QIRLAGIQ---GLQGVVVRT---LSDDLVEN-IWEPVHMCKI  
-----EIRVAGIR---GIQGVVVRT---VNDELQAT-IWEPQHMCKI  
-----EIRIAGIR---GIQGVVVRT---VNDELQAT-IWEPQHMCKI  
-----L-----LMKGCLDIS---KTANLAGN-PGVSSLSIRG  
-----QIRTSGLR---GLQGVVVRT---VSDDLQVN-LWDNTHISKI  
-----MIRMAGIK---GIQGVIRKT---VSDDLVEN-IWEPVHMCKI  
-----SIRMAGIK---GLQGVIRKT---VSDDLVEN-IWEKQHMEKI  
-----SIRMAGIK---GLQGVIRKT---VSDDLVEN-IWEKQHMEKI  
-----QIRLAGIQ---GLQGVVVRT---LSDDLVEN-IWEPVHMCKI  
-----LARCAGLR---GLRGVWKS---VTDDLHPN-IWEQQHMCKI  
-----KIRMSGIK---GLQGVVVRT---VNDELQAN-IWDPQHMCKI  
-----EIRIAGIR---GIQGVVVRT---VNDELQAT-IWEPQHMCKI  
-----KIRMSGIK---GLQGVVVRT---VNDELQAN-IWDPQHMCKI  
-----QSKML-----GLKAFHALTACKFAGTEGGM---YQPHFAIHC  
-----EIRIAGIR---GIQGVVVRT---VNDELQAT-IWEPQHMCKI  
-----EIRIAGIR---GIQGVVVRT---VNDELQAT-IWEPQHMCKI  
-----KIRMAGIK---GLQGVVVRT---VNDELQAN-IWDPQHMCKI  
-----SIRMAGIK---GLQGVIRKT---VSDDLVEN-IWEKQHMEKI  
-----KIRMSGIK---GLQGVVVRT---VNDELQAN-IWDPQHMCKI  
-----KIV-----GLEAAKSIAGSAAIATQTGST-----SISPI  
-----EIRIAGIR---GIQGVVVRT---VNDELQAT-IWEPQHMCKI  
-----EIRIAGIR---GIQGVVVRT---VNDELQAT-IWEPQHMCKI  
-----LKGCLDFS---KISNLGSIHQWSAT-AKNC  
-----EIRIAGIR---GIQGVVVRT---VNDELQAT-IWEPQHMCKI  
-----EIRIAGIR---GIQGVVVRT---VNDELQAT-IWEPQHMCKI  
-----QIRLAGIQ---GLQGVVVRT---VSDDLVEN-IWNMVMCKI  
-----DLM-----LKVCIIDISTIIIGIASDPQLN-YLVPKCVETA  
-----QLRLAGLR---GLQGVVVRT---VSDDLQVN-IWDETHMEKI  
-----SLRLAGLR---GIQGVVVRT---VSDDLVEN-IWEPVHMCKI  
-----QIRIAGIK---GLQAVVRT---VSDDLVEN-IWEPVHMCKI  
-----SIRMAGIK---GLQGVIRKT---VSDDLVEN-IWEKQHMEKI  
-----KVQLHGVR---GLRGVIRKT---VTDELQVN-IWEKQHMCKI  
LGLGLGSLTSLAANVIRVAGIR---GLQGVVVRT---VNDELQAI-IWEPQHMCKL  
-----QIRLAGIQ---GLQGVVVRT---LSDDLVEN-IWEPVHMCKI

Cryptococcus\_neoform\_0  
Drosophila\_melanogaster\_1  
EFR3A\_Equus\_caballus\_2

IPPLLVNTFEGQISE-----LKLKESAKIGMDASPSP--FFSEFAAKGPVA  
VPSLLFNMQF-----CVNV-----MFVKKN---LLASGD-----LTPVEDA  
VPSLLFNMQK-----I-----EEADSR---IGPPSS-----PSAA--D

Neurospora\_crassa\_3  
Debaryomyces\_hanseni\_4  
Saccharomyces\_cerevi\_5  
Ustilago\_maydis\_6  
Ascaris\_suum\_7  
Harpegnathos\_saltato\_8  
Monodelphis\_domestic\_9  
Ailuropoda\_melanoleu\_10  
Ashbya\_gossypii\_11  
Nematostella\_vectens\_12  
Acyrtosiphon\_pisum\_13  
Culex\_quinquefasciat\_14  
Aedes\_aegypti\_15  
Camponotus\_floridanu\_16  
Caenorhabditis\_elega\_17  
EFR3B\_Homo\_sapiens\_18  
EFR3A\_Homo\_sapiens\_19  
EFR3B\_Ailuropoda\_mel\_20  
Schizosaccharomyces\_21  
EFR3A\_Xenopus\_laevis\_22  
EFR3A-Taeniopygia\_gu\_23  
EFR3B\_Danio\_rerio\_24  
Anopheles\_darlingi\_25  
EFR3B\_Mus\_musculus\_26  
Yarrowia\_lipolytica\_27  
EFR3A\_Rattus\_norvegi\_28  
Gallus\_gallus\_29  
Kluyveromyces\_lactis\_30  
Ornithorhynchus\_anat\_31  
EFR3A\_Oryctolagus\_cu\_32  
Nasonia\_vitripennis\_33  
Candida\_glabrata\_34  
Ixodes\_scapularis\_35  
Daphnia\_pulex\_36  
Tribolium\_castaneum\_37  
Anopheles\_gambiae\_38  
EFR3B\_Ciona\_intestin\_39  
Tetraodon\_nigrovirid\_40  
Solenopsis\_invicta\_41

VPMILENLWTENEDFLDVLVLRVQGDNNVEDAPLLRRRTSNATAQP-----SETTGGE  
IPILTETVHA--NNKQSNLLTILKSNVNIEDENHHLGRIASHTKTNQ-----TSRKAQQ  
VAYTISKVFQERNPKFKTLSLEAALE-----SNLGKR----LSRTQT-----RTIGLDK  
TPALVENAKANRVTLDWLRS-----ESNKAT----EGEPTYAEFNIKKPLAIRR  
VPSILFNLQD----DDSL-----ESEDTAETVMNAPFLD-----QPYAVDG  
VPSLLYNMQN-----S-----RYADKE----QATPDS-----PT----E  
VPSLLFNMQK-----L-----EDVDSR----IGPPSS-----PDG---D  
VPSLLFNMQK-----T-----EEVDSR----AGPPPS-----PSAS--D  
VELTLAKFQEVQPRFQGES-----LQVDLHSSEKRLRSRQ-----THLTAAE  
VPSLLFILEE-----SE-----KSFNEFQ  
VPSLLFNMHT-----MNGISE-----EV----N  
VPSLLFNMQS-----VSGS----KSV DQE-----A  
VPSLLYNMQS-----S-----SGSKIV-----DQE---A  
VPSLLYVDKE-----HAMPDS-----PT----E  
VPSILFNLQE-----PDDSGKGFSSSQIPKFDNTFADSTQSHRVD  
VPSLLFNLQH-----V-----EEAESR----SPSPLQ-----APE--K  
VPSLLFNMQK-----I-----EEVDSR----IGPPSS-----PSAT--D  
VPSLLFNLQH-----I-----EEAESR----SPSPLQ-----APE--K  
V--LINSWSESDQEKKSFI-----DLVRSTAKSYKPLPPS-----STGVSLP  
VPSLLFNMQK-----I-----EDTDSR----TGPPAS-----PTTG--D  
VPSLLFNMQK-----I-----EDIDSR----TGPPSS-----PTVG--V  
VPSLLFNLQS-----G-----EGTESR----SPSPLQ-----ASE--K  
VPSLLFNMQS-----GPSKS-----TDTE--T  
VPSLLFNLQH-----V-----EEAESR----SPSPLQ-----APE--K  
VHLLSSSLQE----SQSDL-----EQLDHSLLDLGGGLPDN-----IGGSKRN  
VPSLLFNMQK-----I-----EEVDSR----LGPPSS-----PSAA--D  
VPSLLFNMQK-----I-----EDVDSR----TGPPSS-----PTGG--E  
VSIALTKFQERHPIYSE-----ATIDSSFSEPGSPALKKKLTRTQTKVMGLD  
VPSLLFNMQK-----I-----EDNDSR----IGPPSS-----PPGG--D  
VPSLLFNMQK-----I-----EEVDSR----LGPPSS-----PSAA--D  
VPSLLYNMQN-----A-----RYSNKE----NATPES-----PT----E  
IDQLQARYPQFKENSLLEQ-----PSLTKR----LSKTQT-----RAQEVLE  
VPSLLFNMQD-----A-----RWTPDS-----P  
IPSLLYNMQH-----A-----SGHPEE-----QTDSENGA  
VPSLLFNMQN-----A-----RFLNNE-----AKEV-----IP----E  
VPSLLFNMQS-----GPSKST-----DTE---A  
IPSLLYSMQ-----DDPDSS----LTEEAS-----PGNN--K  
IPSMFLNMQD-----G-----EDMD-R---AGHPST-----PSVAGQD  
VPSLLYNMQN-----S-----RYADKE----DATPDS-----PT----E

Cryptococcus\_neoform\_0  
Drosophila\_melanogas\_1  
EFR3A\_Equus\_caballus\_2  
Neurospora\_crassa\_3  
Debaryomyces\_hanseni\_4  
Saccharomyces\_cerevi\_5  
Ustilago\_maydis\_6  
Ascaris\_suum\_7  
Harpegnathos\_saltato\_8  
Monodelphis\_domestic\_9  
Ailuropoda\_melanoleu\_10  
Ashbya\_gossypii\_11  
Nematostella\_vectens\_12  
Acyrtosiphon\_pisum\_13  
Culex\_quinquefasciat\_14  
Aedes\_aegypti\_15  
Camponotus\_floridanu\_16  
Caenorhabditis\_elega\_17  
EFR3B\_Homo\_sapiens\_18  
EFR3A\_Homo\_sapiens\_19  
EFR3B\_Ailuropoda\_mel\_20  
Schizosaccharomyces\_21  
EFR3A\_Xenopus\_laevis\_22  
EFR3A-Taeniopygia\_gu\_23  
EFR3B\_Danio\_rerio\_24

Q-----RRAPSL-HAHIPGEGKPTSADVVSAAALRSLH---SLLQQCNVTQASQI  
T-----NVTTPA-----LAEVLR---ELVGRASFGHIRSV  
K-----EENPAV-----LAENCFR---ELLGRATFGNMNNA  
P-----GPNPIAFLGTAVDVKLAEEEDIGVLAMQCLR---QVFVAPSRSQTHNP  
D-----LDNDAV-----KDSLNEEALRGLKALFSTSLTSQISEA  
A-----AEDNHD-----LSVKALQ---SYFNTTETDKLNLNS  
T-----RSISAH---VAGEKGPSSSEDVISAAGTLR---GLLRHADAAQVQSI  
V-----ADSPKT-----LSDQFLR---ELMAKAPFGLI-SV  
E-----RSDPPQ-----FAETCMR---ELIGRASFGHIRCV  
K-----EENPAV-----LAENCFR---ELLGRATYGNMNSNA  
K-----EENPAV-----LAENCFR---ELLGRATFGNMNNA  
E-----SRVLGG-----YPEQALQ---SYFSTTETDKLSIA  
S-----DDDPAH-----IAEACLR---ELMSRASFGNIKSV  
D-----KTDSFS-----LAESCLR---ELIGRASFGHVKSIV  
T-----PSTPPV-----LAEAVLR---ELVSRASFGHIRAV  
T-----RSTPPV-----LAEAVLR---ELVSRASFGHIRAV  
E-----RSDPPQ-----FAETCMR---ELIGRASFGHIRCV  
D-----EATPKV-----LSDRCLR---ELMGKASFGSLRAV  
E-----KESPAE-----LAERCLR---ELLGRAAFGNIKNA  
K-----EENPAV-----LAENCFR---ELLGRATFGNMNNA  
E-----KENPAE-----LAERCLR---ELLGRAAFGNIKNA  
E-----HDEAGD-----NIDVAIKKLCIRILFNIYTQTDPLFMAES  
K-----EENPGI-----LAENCFR---ELLGRATYGNMNSNA  
K-----EENPSV-----LAENCFR---ELLGRATYGNMNSNA  
E-----KESPAE-----LTERCFR---ELLGRAAYGNIKNA

Anopheles\_darlingi\_25  
EFR3B\_Mus\_musculus\_26  
Yarrowia\_lipolytica\_27  
EFR3A\_Rattus\_norvegi\_28  
Gallus\_gallus\_29  
Kluyveromyces\_lactis\_30  
Ornithorhynchus\_anat\_31  
EFR3A\_Oryctolagus\_cu\_32  
Nasonia\_vitripennis\_33  
Candida\_glabrata\_34  
Ixodes\_scapularis\_35  
Daphnia\_pulex\_36  
Tribolium\_castaneum\_37  
Anopheles\_gambiae\_38  
EFR3B\_Ciona\_intestin\_39  
Tetraodon\_nigrovirid\_40  
Solenopsis\_invicta\_41

T-----PSTPPL-----LAEAVLR---ELVSRASFGHIKSV  
E-----KENPAE-----LAERCLR---ELLGRAAFGNIKNA  
SMHQDAIDNFIHEESPEK-----QVRYLSFHALLR---TFFDFTSVVQIQSA  
K-----EENPAV-----LAESCFR---ELLGRATFGNMNNA  
K-----EENPAL-----LAENCFR---ELLGRATYGNMNNA  
D-----VSNTGD-----YSILALN---TFFNTTETDKLTIG  
K-----EENPAV-----LAENCFR---ELLGRATYGNMNNA  
K-----EENPAV-----LAESCFR---ELLGRATFGNMNNA  
E-----RSDPPQ-----FAETCMR---ELVGRASFGHIRCV  
I-----PTADND-----LCVATLH---NYFNTEETDKLNLS  
Q-----VESPLS-----LAENCFR---EVMGRATYGHIASV  
R-----NIDPSS-----LAENCLR---ELVGRASFGNIRSV  
D-----QTDPPM-----LAETCLR---ELVGRASFGHIRAV  
T-----PSTPPL-----LAEAVLR---ELVSRASFGHIKSV  
N-----NVNHSAA-----LAEELR---ELFSRATFANVSAA  
G-----EENPAT-----LAENCFR---ELLGRAAYGNMNNA  
E-----RSDPPQ-----FAETCMR---ELIGRASFGHIRCV

Cryptococcus\_neoform\_0  
Drosophila\_melanogas\_1  
EFR3A\_Equus\_caballus\_2  
Neurospora\_crassa\_3  
Debaryomyces\_hanseni\_4  
Saccharomyces\_cerevi\_5  
Ustilago\_maydis\_6  
Ascaris\_suum\_7  
Harpegnathos\_saltato\_8  
Monodelphis\_domestic\_9  
Ailuropoda\_melanoleu\_10  
Ashbya\_gossypii\_11  
Nematostella\_vectens\_12  
Acyrtosiphon\_pisum\_13  
Culex\_quinquefasciat\_14  
Aedes\_aegypti\_15  
Camponotus\_floridanu\_16  
Caenorhabditis\_elega\_17  
EFR3B\_Homo\_sapiens\_18  
EFR3A\_Homo\_sapiens\_19  
EFR3B\_Ailuropoda\_mel\_20  
Schizosaccharomyces\_21  
EFR3A\_Xenopus\_laevis\_22  
EFR3A-Taeniopygia\_gu\_23  
EFR3B\_Danio\_rerio\_24  
Anopheles\_darlingi\_25  
EFR3B\_Mus\_musculus\_26  
Yarrowia\_lipolytica\_27  
EFR3A\_Rattus\_norvegi\_28  
Gallus\_gallus\_29  
Kluyveromyces\_lactis\_30  
Ornithorhynchus\_anat\_31  
EFR3A\_Oryctolagus\_cu\_32  
Nasonia\_vitripennis\_33  
Candida\_glabrata\_34  
Ixodes\_scapularis\_35  
Daphnia\_pulex\_36  
Tribolium\_castaneum\_37  
Anopheles\_gambiae\_38  
EFR3B\_Ciona\_intestin\_39  
Tetraodon\_nigrovirid\_40  
Solenopsis\_invicta\_41

IDRLVMFLDKHG-----WQY-----AERDCFVAEQVTAWIP--LQYRF  
LKPLLLHLDRHE-----LWVP-----NTFAIHTFRIVMISIQ--PQYSY  
VRPVFAHLDDHHK-----LWDP-----NEFAVHCFKIIMYSIQ--AQYSH  
TIALLRFIEERVDQNEQVVKRD---AHGKD-----NGWAIKVFLMAARWAP--VADR  
TRAIKVN-NYAT-----TIDP-----IWGCTFLEMCTTWP--VQLRF  
IRTLRLCLQSTP-----NKELELFVFCNGIP--VQLRY  
VQNVIAWLDNKSALSIPVVKDGRQLVSHWDD-----PEWCCWLAESLCSWTS--LQYRF  
LEPVLKHCDDLHK-----KWEP-----ATFAVTTFRAIMYSI---KDPY  
IRPVLRLHLDNHQ-----LWVP-----NYFAIHTFRIMFSIQ--SQYSY  
VRPVFEHLDDHHH-----LWDP-----NEFAVHCFKVIMYSIQ--AQYSH  
VRPVFAHLDDHHK-----LWDP-----NEFAVHCFKIIMYSIQ--AQYSH  
IRALIKRL-----LEVP-----NKELLQYIANTIP--VQLRY  
INPVLNHLNSSE-----LWVP-----NEFALKVFKIIMFSVQ--NQYNY  
IRPVLKHLDAHH-----MWVP-----NVFATQCFRILMFSIQ--SQYSY  
LKPLLLMHMDNHK-----LWVP-----NRFAIDTFRIVMISIQ--PQYSY  
LKPLLLMHLDNHK-----LWVP-----NRFAIDTFRIVMISIQ--PQYSY  
IRPVLRLHLDNHQ-----LWVP-----NYFAIHTFRIMFSIQ--SQYSY  
IEPVLKHMDDLHK-----RWTPP-----PSFAIHVFRAIISYIQ--SQNSY  
IKPVLIHLDNHS-----LWEP-----KVFAIRCCKIIMYSIQ--PQSHS  
VRPVFAHLDDHHK-----LWDP-----NEFAVHCFKIIMYSIQ--AQYSH  
IKPVLIHLDNHS-----LWEP-----KVFAIRCCKIIMYSIQ--PQSHS  
TKSLIHFFAAKS-----DTPVN-----LEYISVVLNQILDWTF--VELRH  
VKPVFAHLDDHHK-----LWES-----NEFAVSCFKIIMYSIQ--AQYSH  
VRPVFAHLDDHHH-----LWDP-----NEFAVSCFKIIMYSIQ--AQYSH  
VTPVLMHLDNHS-----LWEG-----KTFAVRCFKIIMYSIQ--SQSHS  
LKPLLLHLDQHK-----LWVP-----NRFAIDTFRIVMISIQ--PQYSY  
IKPVLIHLDNHS-----LWEP-----KVFAIRCCKIIMYSIQ--PQSHS  
TRAIVTYIINSN-----VP-----EHWATSLVVIVAKWAP--VQYRF  
VRPVFAHLDDHHK-----LWDP-----NEFAVHCFKIIMYSIQ--AQYSH  
VRPVFAHLDDHHK-----LWDP-----NEFAVSCFKIIMYSIQ--AQYSH  
LHALIEHL-----LETP-----NKELELFICNGIP--VQLRY  
VRPVFAHLDDHHK-----LWDP-----NEFAVHCFKIIMYSIQ--AQYSH  
VRPVFAHLDDHHK-----LWDP-----NEFAVHCFKIIMYSIQ--AQYSH  
IKPVLKHLDDNHQ-----LWVP-----NYFAIHTFRIMFSIQ--SQYSY  
IRSLIKKLQSTP-----NKELELFISNDIP--VQLRY  
IKPVLKHLDDNHR-----LWVP-----NTFAIYTFKIIISVS--NVESY  
IKPVFKHLDLHE-----LWVP-----NDFAIYTFRIVMYSIQ--VQYSY  
LKPVLKHFDDLHK-----LWAPEDNPNNEFAIHTFRIMFSIQ--AQYSY  
LKPLLLHLDHHK-----LWVP-----NKFAIDTFRIVMISIQ--PQYSY  
LVPALSHMDNHS-----LWGP-----NGFAIKCFKIMYSIQ--AQYSH  
VRPVLVHLDNHH-----LWEP-----NEFAVSCFRIMYSIQ--AQSHS  
IRPVLRLHLDNHQ-----LWVP-----NYFAIHTFRIMFSIQVHSQYSY

Cryptococcus\_neoform\_0  
Drosophila\_melanogas\_1  
EFR3A\_Equus\_caballus\_2  
Neurospora\_crassa\_3

IVPTRLVEVLMDLQDRTPPKHTSAL-----AM---VTIILNSTSLV-----  
TVVETLMQ-HLDNNFKSSPKTRT-SLAV-----VL---SKIIAIAAGESV-----  
HVIQEILG-HLDARKKDSPRVRA-GIIQ-----VL---LEAVAIKAGSI-----  
TILLTAIE-VLTQRPLTDDNLRHHNTQA-----AM---ISALLRSDVNLII-----



Debaryomyces\_hanseni\_4 ITLSTVLS-SLTSLSNKSTKKTSNYPIQ-----LLYANYCLGLVSSDVNMI-----  
Saccharomyces\_cerevi\_5 IVILLVLRQLSDKDKNPNIVSL-----KL----MSSLVSDVSIV-----  
Ustilago\_maydis\_6 VVLDTLVD-HLAENGEKATNKHLSLIQ-----M----SRTILTGQLSLI-----  
Ascaris\_suum\_7 FVIQALIN-HLENMSSSNASVRI-GIAT-----VL----SSIVSIA-GTSI-----  
Harpegnathos\_saltato\_8 TVVEALMT-HLDDHKSPPKIRT-SIAD-----TL----SKIISIAAGESV-----  
Monodelphis\_domestic\_9 HVIQETLA-HLDVRKKDSPRVRA-GIIQ-----VL----LEAVAI AAKGSI-----  
Ailuropoda\_melanoлеu\_10 HVIQEILG-HLDARKKDSPRVRA-GIIQ-----VL----LEAVAI AAKGSI-----  
Ashbya\_gossypii\_11 ILVLVFTH-ALNQEDEHA-----VLL-----KL----MTLLVSDVSI I-----  
Nematostella\_vectens\_12 VVIQMLLS-YLDASSKESAKKKA-GVVS-----VL----AECVGLATGSSI-----  
Acyrtosiphon\_pisum\_13 AVVETLMT-HLDENGNASPKIRT-SIAD-----VL----SKI IAIANESV-----  
Culex\_quinquefasciat\_14 TVVETLMS-HLDQNLASSPKTRT-SLAV-----VL----SKI IAI AAGESV-----  
Aedes\_aegypti\_15 TVVETLMS-HLDQNLASSPKTRT-SLAV-----VL----SKI IAI AAGESV-----  
Camponotus\_floridanu\_16 TVVEALMT-HLDDHKSPPKIRT-SIAD-----TL----SKI ISIAAGESV-----  
Caenorhabditis\_elega\_17 FVIQELIN-HLDSMCSADASTRI-GIAT-----VL----SSIVSIA-GTSI-----  
EFR3B\_Homo\_sapiens\_18 LVIQQLLG-HLDANSRSAATVRA-GIVE-----VL----SEAAVIAATGSV-----  
EFR3A\_Homo\_sapiens\_19 HVIQEILG-HLDARKKDAPRVRA-GIIQ-----VL----LEAVAI AAKGSI-----  
EFR3B\_Ailuropoda\_mel\_20 LVIQQLLS-HLDANSRSAATVRA-GIVE-----VL----SEAAVIAATGSV-----  
Schizosaccharomyces\_21 SIFFCCLR-CLSSSRIVNSETVN-MVP-----YM----YSILNSKNSIS-----  
EFR3A\_Xenopus\_laevis\_22 HVIQQILV-HLDLHKKDSPRIRA-GIVQ-----VL----LEAVAI AAKGSI-----  
EFR3A-Taeniopygia\_gu\_23 HVIQEILG-HLDVRKRK DSPRVRA-GIIQ-----VL----LEAVAI AAKGSI-----  
EFR3B\_Danio\_rerio\_24 LVIQQLLG-HLDANSKSSATVRA-GIVE-----VL----LEVAIAAASGSV-----  
Anopheles\_darlingi\_25 TVVETLMS-HLDQNLTSPPKTRT-SLAV-----VL----SKI IAI AAGESV-----  
EFR3B\_Mus\_musculus\_26 LVIQQLLS-HLDANSRSAATVRA-GIVE-----VL----SEAAI I AATGSV-----  
Yarrowia\_lipolytica\_27 VILVSLVE-MLVAMSPNNVKSEL--VVA-----AL----IHALLSSTVNMV-----  
EFR3A\_Rattus\_norvegici\_28 HVIQEILG-HLDARKK DSPRVRA-GIIQ-----VL----LEAVAI AAKGSI-----  
Gallus\_gallus\_29 HVIQEILG-HLDACKKDPPRVRA-GIIQ-----VL----LEAVAI AAKGSI-----  
Kluyveromyces\_lactis\_30 IVILLFVR-PLGTSSEKNMLLIL-----KL----ISSLLTSAVSII-----  
Ornithorhynchus\_anat\_31 HVIQETLG-HLDARKK DSPRVRA-GIVQ-----VL----LEAVAI AAKGSI-----  
EFR3A\_Oryctolagus\_cu\_32 HVIQEILG-HLDACKK DSPRVRA-GIIQ-----VL----LEAVAI AAKGSI-----  
Nasonia\_vitripennis\_33 TVVEALMT-HLDEHSQSSPKIRT-SIAD-----TL----SKI ISIAAGESV-----  
Candida\_glabrata\_34 IVVLLLTR-QVSNYERNQVSGSQ-GNPDGALNSLKL----ISCLLVSKISIV-----  
Ixodes\_scapularis\_35 EITSALTQEDGGERLSRGPVVRM-GIVN-----VL----FHLVNI AAGESV-----  
Daphnia\_pulex\_36 AVVENLMM-HLDTSSRSRAKVRT-SMAN-----VL----AKI ISIAAGESV-----  
Tribolium\_castaneum\_37 TVVETLVA-HLDNAKSSPIIRT-SISG-----VL----SKI IAI AAGESV-----  
Anopheles\_gambiae\_38 TVVETLMS-HLDQNLTSPPKTRT-SLAV-----VL----SKI IAI AAGESV-----  
EFR3B\_Ciona\_intestin\_39 VVVKMLLD-HLDENTKEDDDIKA-SMLQ-----VL----CIIVPI PSSAAI-----  
Tetraodon\_nigrovirid\_40 HVIQQVLN-HLDTHSRDPPRVRA-GIVQ-----VL----LETVAI AAKGSVAGVLGNHS  
Solenopsis\_invicta\_41 TVVEALMT-HLDDHKSPPKIRT-SIAD-----TL----SKI ISIAAGESV-----

Cryptococcus\_neoform\_0 -----GLGVTDLLQHLVLSLIIRRIHF  
Drosophila\_melanogas\_1 -----GPSALDI INNLLTHLRTSVS-  
EFR3A\_Equus\_caballus\_2 -----GPTVLEVFNTLLKHLRLSVEF  
Neurospora\_crassa\_3 -----GLSVMDVLLNLLRHMQRVQ  
Debaryomyces\_hanseni\_4 -----GLSISDVIQI---LFLQANL  
Saccharomyces\_cerevi\_5 -----GLSVLDIMRKLNFQQLKAT-  
Ustilago\_maydis\_6 -----GLSTSDTLSNLCALAVRRVYK  
Ascaris\_suum\_7 -----GPSLLGIFNSLLKHLRQSVF  
Harpegnathos\_saltato\_8 -----GPSVLEI INSLLSHLRVSVT-  
Monodelphis\_domestic\_9 -----GPTVLEVFNTLLKHLRLSVEF  
Ailuropoda\_melanoлеu\_10 -----GPTVLEVFNTLLKHLRLSVVF  
Ashbya\_gossypii\_11 -----GLSVLDLLRKI INFQLASAT-  
Nematostella\_vectens\_12 -----GPAVLEVFNTLLRHLRYSVDA  
Acyrtosiphon\_pisum\_13 -----GPTVLEI INSLLTNLRTSVTR  
Culex\_quinquefasciat\_14 -----GPSALDI INNLLTHLKT SVS-  
Aedes\_aegypti\_15 -----GPSALDI INNLLTHLKT SVS-  
Camponotus\_floridanu\_16 -----GPSVLEI INSLLSHLRVSVT-  
Caenorhabditis\_elega\_17 -----GPLLSIFNSLLKHLRVSDF  
EFR3B\_Homo\_sapiens\_18 -----GPTVLEMFNTLLRQLRLSIDY  
EFR3A\_Homo\_sapiens\_19 -----GPTVLEVFNTLLKHLRLSVEF  
EFR3B\_Ailuropoda\_mel\_20 -----GPTVLEMFNTLLRQLRLSIDY  
Schizosaccharomyces\_21 -----GLSVI DVLRDLGSHLINAVNS  
EFR3A\_Xenopus\_laevis\_22 -----GPTVLEVFNTLLKHLTLSVDF  
EFR3A-Taeniopygia\_gu\_23 -----GPTVLEVFNTLLKHLRISVDF  
EFR3B\_Danio\_rerio\_24 -----GPTVLEVFNTLLRHLRLSVDY  
Anopheles\_darlingi\_25 -----GPSALDI INNLLMHLKT SVS-

EFR3B\_Mus\_musculus\_26  
Yarrowia\_lipolytica\_27  
EFR3A\_Rattus\_norvegi\_28  
Gallus\_gallus\_29  
Kluyveromyces\_lactis\_30  
Ornithorhynchus\_anat\_31  
EFR3A\_Oryctolagus\_cu\_32  
Nasonia\_vitripennis\_33  
Candida\_glabrata\_34  
Ixodes\_scapularis\_35  
Daphnia\_pulex\_36  
Tribolium\_castaneum\_37  
Anopheles\_gambiae\_38  
EFR3B\_Ciona\_intestin\_39  
Tetraodon\_nigrovirid\_40  
Solenopsis\_invicta\_41

Cryptococcus\_neoform\_0  
Drosophila\_melanog\_1  
EFR3A\_Equus\_caballus\_2  
Neurospora\_crassa\_3  
Debaryomyces\_hanseni\_4  
Saccharomyces\_cerevi\_5  
Ustilago\_maydis\_6  
Ascaris\_suum\_7  
Harpegnathos\_saltato\_8  
Monodelphis\_domestic\_9  
Ailuropoda\_melanoleu\_10  
Ashbya\_gossypii\_11  
Nematostella\_vectens\_12  
Acyrtosiphon\_pisum\_13  
Culex\_quinquefasciat\_14  
Aedes\_aegypti\_15  
Camponotus\_floridanu\_16  
Caenorhabditis\_elega\_17  
EFR3B\_Homo\_sapiens\_18  
EFR3A\_Homo\_sapiens\_19  
EFR3B\_Ailuropoda\_mel\_20  
Schizosaccharomyces\_21  
EFR3A\_Xenopus\_laevis\_22  
EFR3A-Taeniopygia\_gu\_23  
EFR3B\_Danio\_rerio\_24  
Anopheles\_darlingi\_25  
EFR3B\_Mus\_musculus\_26  
Yarrowia\_lipolytica\_27  
EFR3A\_Rattus\_norvegi\_28  
Gallus\_gallus\_29  
Kluyveromyces\_lactis\_30  
Ornithorhynchus\_anat\_31  
EFR3A\_Oryctolagus\_cu\_32  
Nasonia\_vitripennis\_33  
Candida\_glabrata\_34  
Ixodes\_scapularis\_35  
Daphnia\_pulex\_36  
Tribolium\_castaneum\_37  
Anopheles\_gambiae\_38  
EFR3B\_Ciona\_intestin\_39  
Tetraodon\_nigrovirid\_40  
Solenopsis\_invicta\_41

Cryptococcus\_neoform\_0  
Drosophila\_melanog\_1  
EFR3A\_Equus\_caballus\_2  
Neurospora\_crassa\_3  
Debaryomyces\_hanseni\_4

-----GPTVLEMFNTLLRQLRLSIDY  
-----GLSVMDILGSLLNKQAAI IKH  
-----GPTVLEVFNTLLKHLRLSVEL  
-----GPTVLEVFNTLLKHLRISVDF  
-----GLSVIDI LRRLI-----  
-----GPTVLEVFNTLLKHLRLSVEL  
-----GPTVLEVFNTLLKHLRLSVEF  
-----GPSVLEI ISSLLTHLRVSVS-  
-----GLSVLDIMRKVLAVQLKSKES  
-----GPSVLEVFHSLLNHLRHSIDM  
-----GPSVLEIVNSLLKHLKQSIMS  
-----GPMVLEI INSLLCHLRDSVKH  
-----GPSALDI INNLLMHLKTSVST  
-----GPSVLDVFNRI SKHLHLCAD-  
DGRRTQRPVDARRAEVCPEDGVRQEHGGPAGGVVSPGPTVLEVFNTLLKHLRVSVDL  
-----GPSVLEI INSLLSHLRVSVT-

DLRD-----ALLPSLVQCVSSLGTHIYYADQINDIVEELALRI  
-----TTSEITPEESQYQEALINALGEFANHHHPDYQKIEIMLF-IMNTV  
EANDLQGGSVSANLNASS-KDNDEKIVQNAI IQTIGFFGSNLPDYQRSEIMMF-IMGKV  
PGDPDS-MRVEDETIGTDEGAIQORRELLFRLQCCVGLATHVYYADQISDMIQTILLKL  
LLSQ-----SHYFQEEDEVKLSMI YSNICINLSTHIYYFDQVPSIREILLIKV  
-----NKEVVAQSCI--TMTDLNHKTYAEQTSDMLYELLKLL  
DTRD-----SLLPPLVDCISGLGTHVYYADQINDIVEEISGRI  
QQSK-----DCPSVEQEKIYQETLINAMGDYANALPDYQKVEIMMF-TVGNI  
-----RNQSSSDEQLYQEALINALGEFANHLDPYQKIEIMMF-IMSKV  
EAGERR-GSMGSVNVSTST-KDNDEKIVQNAI IQTIGFFGSNLPDYQRSEIMMF-IMGKV  
EANDLQGGSGSANLNSSS-KDNDEKIVQNAI IQTIGFFGSNLPDYQRSEIMMF-IMGKV  
-----SPQVTEACTNTI SALNRKTYKQDQPIDMISELLKLL  
RFNS-----SGHGCKLEDEMFEQSI VHTI GAFALLPDPKTDVMLF-IMDKF  
RPPS-----NTGLSESDGENEYREALIHALGEFAAHLDPYQKIEIMMF-IMSKV  
-----TQHESTPEETQYQEALINALGEFANHHHPDYQKIEIMLF-IMNTV  
-----TQHESTPEETQYQEALINALGEFANHHHPDYQKIEIMLF-IMNTV  
-----RNQSSNDEQLYQEALINALGEFANHLDPYQKIEIMMF-IMSKV  
ERSG-----KCSQDPAEKMYQEALINAMGDFANALPDYQKVEIMMF-TVGNI  
ALTG---SYDGAVSLGTKI IKEHEERMFQEAVIKTVGSFASTLPTYQRSEVILF-IMSKV  
EANDLQGGSVGSVNLNTSS-KDNDEKIVQNAI IQTIGFFGSNLPDYQRSEIMMF-IMGKV  
ALTG---SYDGAISLGTKI IKEHEERMFQEAVIKTVGSFASTLPTYQRSEVILF-IMSKV  
FDADDQTWY---NMCEPSEKLPRLRYL--LLVCITCLTKHQYDEEFADVWR-EIDTL  
ELGDRR-SSAGSAVFSSTSTRESDERIVQNAI IQTIGFFGSNLPDYQRSEIMMF-IMGKV  
ELSDRR-SSLESTTLISS-KESDERIVQNAI IQTIGFFGSNLPDYQRSEIMMF-IMSKV  
ELTG---SYD-CTNIGTKI IKEHEERQLQEAVIRTIGSFANTLPTYQRSEVILF-IMGKV  
-----TQHESASEETQYQEALINALGEFANHHHPDYQKIEIMLF-IMNTV  
ALTG---SYDGAVSLGSKI IKEHEECMFQEAVIKTVGSFASTLPTYQRSEVILF-IMSKV  
AQSN-----NEASGAFEELIDKLSACMISLGTHIYYADQISDMVGEVLWRC  
EASDSQKGSVGSVLSLSS---KDNDEKIVQNAI IQTIGFFGSNLPDYQRSEIMMF-IMGKV  
ELGDRR-SSAGSATFSTSS-KENDERIVQNAI IQTIGFFGSNLPDYQRSEIMMF-IMGKV  
-----TVQLAKSDSTTVVKQIAVTIKDLNRKTYKQSSDMFAELSFKF  
ESGDAR-SSVGSASFSTSS-KDNDEKIVQNAI IQTIGFFGSNLPDYQRSEIMMF-IMGKV  
EANDLQGGPAGSASLNTSS-KDNDEKIVQNAI IQTIGFFGSNLPDYQRSEIMMF-IMGKV  
-----RNQSSNDEQLYQEALINALGEFANHLDPYQKIEIMMF-IMSKV  
-----MPLVHQCRVTIKDLNKKIYYSEQTSDMLYDLVVKI  
HSEE-----ELEDEHQFQEAVIGTLGEFANLDPYQKIEIMMF-ILGKV  
AIPV-----DDAEVADEKQFQESLISALAEFAYHLPDYQKIEIMMF-IIGRT  
GTSM-----TEEKQYQDALINALGEFANHLDPYQKIEIMMF-IMSKI  
QHDE-----STPEETQYQEALINALGEFANHHHPDYQKIEIMLF-IMNTV  
-----SKPHSKFEEALIIETTGVLAAVVPDYQKLETFMTF-YVNRA  
ELGDGS-RRNSAASVSSAR-RESEERIVQNAI IQTIGFFGSNLPDYQRAEVMMF-IMGKV  
-----RNQSSSDEQLYQEALINALGEFANHLDPYQKIEIMMF-IMSKV

-AE-----IPSSD-----TAR-----SEII  
-PD-----LSKK-----SKG-----DQML  
-PV-----FGTSTHTLDISQLG-DLG-----TRRI  
RPS-----RPTSPNNSPNGERSDNGAAE---DQPL  
-----VSILENSVISGNANSSGV-----YRFI

Saccharomyces\_cerevi\_5  
Ustilago\_maydis\_6  
Ascaris\_suum\_7  
Harpegnathos\_saltato\_8  
Monodelphis\_domestic\_9  
Ailuropoda\_melanoleu\_10  
Ashbya\_gossypii\_11  
Nematostella\_vectens\_12  
Acyrtosiphon\_pisum\_13  
Culex\_quinquefasciat\_14  
Aedes\_aegypti\_15  
Camponotus\_floridanu\_16  
Caenorhabditis\_elega\_17  
EFR3B\_Homo\_sapiens\_18  
EFR3A\_Homo\_sapiens\_19  
EFR3B\_Ailuropoda\_mel\_20  
Schizosaccharomyces\_21  
EFR3A\_Xenopus\_laevis\_22  
EFR3A-Taeniopygia\_gu\_23  
EFR3B\_Danio\_rerio\_24  
Anopheles\_darlingi\_25  
EFR3B\_Mus\_musculus\_26  
Yarrowia\_lipolytica\_27  
EFR3A\_Rattus\_norvegi\_28  
Gallus\_gallus\_29  
Kluyveromyces\_lactis\_30  
Ornithorhynchus\_anat\_31  
EFR3A\_Oryctolagus\_cu\_32  
Nasonia\_vitripennis\_33  
Candida\_glabrata\_34  
Ixodes\_scapularis\_35  
Daphnia\_pulex\_36  
Tribolium\_castaneum\_37  
Anopheles\_gambiae\_38  
EFR3B\_Ciona\_intestin\_39  
Tetraodon\_nigrovirid\_40  
Solenopsis\_invicta\_41

-----KSDTVKDVKNVAV-EDI-----DFLV  
-AALQMPESISDAASVKASNNLGAVHRGQQDLSSHLHRQRLANAGPEQR-----DESI  
-PK-----LSEDGRALK-----PG-----DAFL  
-P-----YSQPDRIVSV-----GKG-----DVLL  
-PV-----FGTTHTLDTSQLG-DLG-----TRRI  
-PV-----FGTSTHTLDISQLG-DLG-----TRRI  
-KE-----HPG-----QREK  
-PH-----RNTNQHTSDRRSLRFTES-----DVEL  
-PQ-----FKSSNNPN-----DLHV  
-PD-----PSKK-----NKG-----DTLL  
-PD-----PSKK-----NKG-----DQLL  
-P-----YSQPDRIVSV-----GKG-----DVLL  
-PN-----LDERKS-----KQG-----DEFL  
-P-----RPSLHQAVDTGRTG-ENR-----NRLT  
-PV-----FGTSTHTLDISQLG-DLG-----TRRI  
-P-----LPSLHHPMETGRTG-ENR-----NRLT  
-----ANSET-----SSAI  
-PV-----FGSSPHMLDTSQLG-DMG-----TKRI  
-PV-----LGTTSQLDPSNLG-DLG-----PRRI  
-P-----IPGLHPTLPSIGSG-PEG-----NRMI  
-PD-----PSNK-----SRG-----DQLL  
-P-----LPSVHHPVETGRTG-ENR-----NRLT  
-TD-----PATAGQTGHAVSADDGTGLQIKRPTRRV  
-PV-----FGTSTHTLDISQLG-DLG-----TRRI  
-PV-----LGATSQSLDTSHLG-DLG-----TRRI  
-IE-----SGKPHH-----LELF  
-PV-----FGTTHTLDTSQLG-DLG-----TRRI  
-PV-----FGTSAHTLDISQLG-DLG-----TRRI  
-P-----YGEPDSITSA-----GKG-----DVLL  
-KN-----VQNEV-----EKRI  
-P-----QSQEAESSDPRQ---RNS-----EVLL  
-PV-----AGEFDPENVQA-----ETLL  
-PF-----PLVDNHTPA-----DNLL  
-PD-----PSHK-----SKG-----DHLL  
-NE-----VLHNSEDLNE-----TDV-----EQNF  
-PV-----FGTPCHTLDTVKIE-----  
-P-----YSQPDRIVSV-----GKG-----DVLL

Cryptococcus\_neoform\_0  
Drosophila\_melanogas\_1  
EFR3A\_Equus\_caballus\_2  
Neurospora\_crassa\_3  
Debaryomyces\_hanseni\_4  
Saccharomyces\_cerevi\_5  
Ustilago\_maydis\_6  
Ascaris\_suum\_7  
Harpegnathos\_saltato\_8  
Monodelphis\_domestic\_9  
Ailuropoda\_melanoleu\_10  
Ashbya\_gossypii\_11  
Nematostella\_vectens\_12  
Acyrtosiphon\_pisum\_13  
Culex\_quinquefasciat\_14  
Aedes\_aegypti\_15  
Camponotus\_floridanu\_16  
Caenorhabditis\_elega\_17  
EFR3B\_Homo\_sapiens\_18  
EFR3A\_Homo\_sapiens\_19  
EFR3B\_Ailuropoda\_mel\_20  
Schizosaccharomyces\_21  
EFR3A\_Xenopus\_laevis\_22  
EFR3A-Taeniopygia\_gu\_23  
EFR3B\_Danio\_rerio\_24  
Anopheles\_darlingi\_25  
EFR3B\_Mus\_musculus\_26

RVLTCCISGVMIMTD-----AADNDAESKQGN  
QNIL--LKSLLKVGVT-----QYST---  
QIML--LRSLLMVTS-----GYKA---  
ESLF--ALTVAKIAA-----LKAIKAILWVASPRTKMSGGHI---  
ITLLEDISIIIFDLLQ-----TKPS---  
EHIT-----  
RVLLFCLQGVLKATHQSSGEIHEAVDVKSNGAEKGGAAAASTDSKIGLAH-----  
QHVL--VKTLLKVAT-----KYKT---  
QSIL--LKSLLKVGVT-----KYQT---  
QIML--LRSLLMVTS-----GYKA---  
QIML--LRSLLMVTS-----GYKA---  
DILISDLQAVLQTVG-----  
QKML--LHSLRQVSV-----SYNP---  
QRMC--LKSLLMVST-----KYSS---  
QNIL--LKSLLKVGVT-----QYRT---  
QNIL--LKSLLKVGVT-----QYRT---  
QSIL--LKSLLKVGVT-----KYQT---  
QHVL--VKTLLKVAT-----KYRT---  
QIML--LKSLLQVST-----GFQC---  
QIML--LRSLLMVTS-----GYKA---  
QIML--LKSLLQVST-----GFQC---  
QMVA--LTAFHKLQN-----EKLN---  
QIML--LRSLLMVTS-----GYKA---  
QIML--LRSLLMVTS-----GYKA---  
QVML--LKSLLRQVTC-----GFQT---  
QNIL--LKSLLKVGVT-----QYRT---  
QIML--LKSLLQVST-----GFQC---

|                         |                                                              |
|-------------------------|--------------------------------------------------------------|
| Yarrowia_lipolytica_27  | FTTLSANNAELQHSS-----DESVGAAATGGTANGSAGVGSFSDHNSP             |
| EFR3A_Rattus_norvegi_28 | QIML--LRSLLMVTS-----GYKA----                                 |
| Gallus_gallus_29        | QIML--LRSLLMVTS-----GYKA----                                 |
| Kluyveromyces_lactis_30 | QLDL--DSLISVTS-----                                          |
| Ornithorhynchus_anat_31 | QIML--LRSLLMVTS-----GYKA----                                 |
| EFR3A_Oryctolagus_cu_32 | QIML--LRSLLMVTS-----GYKA----                                 |
| Nasonia_vitripennis_33  | QSIL--LKSLLKVGVT-----KYQT----                                |
| Candida_glabrata_34     | LVDD--MKYIVD-----                                            |
| Ixodes_scapularis_35    | QHIL--LKSLLTVGQ-----KYRT----                                 |
| Daphnia_pulex_36        | QHML--LKCLLKVSY-----KYQS----                                 |
| Tribolium_castaneum_37  | QSIL--LKSLLKVGVT-----KYQT----                                |
| Anopheles_gambiae_38    | QNIL--LKSLLKVGVT-----QYRT----                                |
| EFR3B_Ciona_intestin_39 | AHLL--LLCLVQIAK-----TYHC----                                 |
| Tetraodon_nigrovirid_40 | -----VTS-----GFKS----                                        |
| Solenopsis_invicta_41   | QSIL--LKSLLKVGVT-----KYQT----                                |
| Cryptococcus_neoform_0  | NVPQPTPSTPGSPTPPNKGKLPAPAETPFLTPLFEYLRPQAHRSSRRNPISPEVWQ---- |
| Drosophila_melanogas_1  | -----VSFEKAFPASFLQ----                                       |
| EFR3A_Equus_caballus_2  | -----KTIVTALPGSFLD----                                       |
| Neurospora_crassa_3     | -----NLSRNRVPIQTWD----                                       |
| Debaryomyces_hanseni_4  | -----NISRNHVSLEDWDLSLI                                       |
| Saccharomyces_cerevi_5  | -----QPSISLELFI----                                          |
| Ustilago_maydis_6       | -----AGTRNRVAPASIL----                                       |
| Ascaris_suum_7          | -----AYLATIFADSFLS----                                       |
| Harpegnathos_saltato_8  | -----IHLNNTTFPPSFLD----                                      |
| Monodelphis_domestic_9  | -----KTIVTALPAPFLD----                                       |
| Ailuropoda_melanoleu_10 | -----KTIVTALPGSFLD----                                       |
| Ashbya_gossypii_11      | -----QPFMTLELFL----                                          |
| Nematostella_vectens_12 | -----TSLSAVFSPSFMD----                                       |
| Acyrtosiphon_pisum_13   | -----VQMNATFPQSFLD----                                       |
| Culex_quinquefasciat_14 | -----VSFEKAFPVSFLQ----                                       |
| Aedes_aegypti_15        | -----VSFEKAFPVSFLQ----                                       |
| Camponotus_floridanu_16 | -----IHLNNTTFPPSFLD----                                      |
| Caenorhabditis_elega_17 | -----AYLATVFTDSFLD----                                       |
| EFR3B_Homo_sapiens_18   | -----NNMMSALPSNFLD----                                       |
| EFR3A_Homo_sapiens_19   | -----KTIVTALPGSFLD----                                       |
| EFR3B_Ailuropoda_mel_20 | -----NNMMSALPSNFLD----                                       |
| Schizosaccharomyces_21  | -----TKKESAPLSLVT----                                        |
| EFR3A_Xenopus_laevis_22 | -----KTIAAALPPAFLD----                                       |
| EFR3A-Taeniopygia_gu_23 | -----TTISNALPAPFLD----                                       |
| EFR3B_Danio_rerio_24    | -----TNMLTALPNSFLD----                                       |
| Anopheles_darlingi_25   | -----VSFEKAFPVSFLQ----                                       |
| EFR3B_Mus_musculus_26   | -----NNMMSALPSNFLD----                                       |
| Yarrowia_lipolytica_27  | DVLIRRLAIVEGFFRLQNEEQD-----MTAHNSVPLSAWD----                 |
| EFR3A_Rattus_norvegi_28 | -----KTIVTALPGSFLD----                                       |
| Gallus_gallus_29        | -----MTITNALPAPFLD----                                       |
| Kluyveromyces_lactis_30 | -----DQCLDLDLFG----                                          |
| Ornithorhynchus_anat_31 | -----KTIVTALPPPFLD----                                       |
| EFR3A_Oryctolagus_cu_32 | -----KTIVTALPGSFLD----                                       |
| Nasonia_vitripennis_33  | -----IHLNNTTFPPSFLQ----                                      |
| Candida_glabrata_34     | -----DISQPVINVDLLT----                                       |
| Ixodes_scapularis_35    | -----VQLGQAFPASFLH----                                       |
| Daphnia_pulex_36        | -----TNFSTSLPLTFLD----                                       |
| Tribolium_castaneum_37  | -----IHLNSTFPVSFLE----                                       |
| Anopheles_gambiae_38    | -----VSFEKAFPVSFLQ----                                       |
| EFR3B_Ciona_intestin_39 | -----SNISN-LTVTLLLE----                                      |
| Tetraodon_nigrovirid_40 | -----KSMAAALPVSFLD----                                       |
| Solenopsis_invicta_41   | -----IHLNNTTFPPSFLD----                                      |
| Cryptococcus_neoform_0  | -----ETLPLLCEADYSVRSTYARALILFLETEMQRGPTPRT-TPASGGS           |
| Drosophila_melanogas_1  | -----PLLKMARAPHNPTRMV---VMQILQALL-----DRH-----               |
| EFR3A_Equus_caballus_2  | -----PLLSPSLMEDYELRQL---VLEVMMHNL-----DRH-----               |
| Neurospora_crassa_3     | -----GTQWLLRDPDGLVRKA---YVDAVVTWL-----DRETPA----             |
| Debaryomyces_hanseni_4  | LLSSEIGLNPTKDQKPLFSYEQITDIQFK-----YLRVFGYFL-----NNEL-----    |
| Saccharomyces_cerevi_5  | -----DLAH--YMKNHIIICLF-----NIVETEVEV-----PSS-----            |

|                         |                                                           |
|-------------------------|-----------------------------------------------------------|
| Ustilago_maydis_6       | -----PTASLLASPNHAVRLA---YAQTLITLFRDEFDREQLERESAVF         |
| Ascaris_suum_7          | -----TLLQLALVADPCVRLD---TQHIFHTLL-----DRH-----            |
| Harpegnathos_saltato_8  | -----PLLRLMSLAADAEMRLL---VQKIFHTLI-----DRH-----           |
| Monodelphis_domestic_9  | -----PILSPSLMEDYELRQL---VLEIMHNL-----DRH-----             |
| Ailuropoda_melanoleu_10 | -----PLLSPSLMEDYELRQL---VLEVMHNL-----DRH-----             |
| Ashbya_gossypii_11      | -----ELAPYVPDRLELFLSLV---TDKLPGGFV-----                   |
| Nematostella_vectens_12 | -----AIFHAAIVENPEVRQL---ALEVIFALI-----DRH-----            |
| Acyrtosiphon_pisum_13   | -----LLLKTLTASEDEIRFI---VLRILHTLL-----DRH-----            |
| Culex_quinquefasciat_14 | -----PLLKMARASSLPIRVI---VMQIFQQL-----DRH-----             |
| Aedes_aegypti_15        | -----PLLKMARASSVAIRVI---VMQIFQQL-----DRH-----             |
| Camponotus_floridanu_16 | -----PLLRLMSLAADAEMRLL---VQKIFHTLI-----DRH-----           |
| Caenorhabditis_elega_17 | -----TLLLLLALVRDPQVRLA---TQQIFHTLL-----DRH-----           |
| EFR3B_Homo_sapiens_18   | -----RLLSTALMEDAEIRLF---VLEILISFI-----DRH-----            |
| EFR3A_Homo_sapiens_19   | -----PLLSPSLMEDYELRQL---VLEVMHNL-----DRH-----             |
| EFR3B_Ailuropoda_mel_20 | -----RLLSTALMEDAEIRLF---VLEILISFI-----DRH-----            |
| Schizosaccharomyces_21  | -----DFLLHSWPKSAE-----RLH-----                            |
| EFR3A_Xenopus_laevis_22 | -----PLLSPSLMEDCELRLQ---VLEILHNL-----DRH-----             |
| EFR3A-Taeniopygia_gu_23 | -----PLLSPSLMEDSELRLQ---VLEILHNL-----DRH-----             |
| EFR3B_Danio_rerio_24    | -----PMLSFALLEDAEIRLL---VLEILVSL-----DRH-----             |
| Anopheles_darlingi_25   | -----PLLKMARAGSIPIRII---VMQIFQQL-----DRH-----             |
| EFR3B_Mus_musculus_26   | -----RLLSTALMEDAEIRLF---VLEILISFI-----DRH-----            |
| Yarrowia_lipolytica_27  | -----GTQYLLNHDSAIVKEA---YVFCFVAF-----EYE-----             |
| EFR3A_Rattus_norvegi_28 | -----PLLSPSLMEDYELRQL---VLEVMHNL-----DRH-----             |
| Gallus_gallus_29        | -----PLLSPSLMEDSELRLQ---VLEILHNL-----DRH-----             |
| Kluyveromyces_lactis_30 | -----EFLPYVTDKTLQSKLL---YPEAPHQVI-----                    |
| Ornithorhynchus_anat_31 | -----PLLSASLMEDYELRQL---VLEILHNL-----DRH-----             |
| EFR3A_Oryctolagus_cu_32 | -----PLLSPSLMEDYELRQL---VLEVMHNL-----DRH-----             |
| Nasonia_vitripennis_33  | -----PLLRLMSLASDFEMRLL---VQKIFHTLI-----DRH-----           |
| Candida_glabrata_34     | -----ELVP--FMKGSVIQLL-----NITEEHI-----SGG-----            |
| Ixodes_scapularis_35    | -----SLLRMSLAADPSVRLV---VQSILHTLL-----DRH-----            |
| Daphnia_pulex_36        | -----PLLRTSLGQDAYVRVL---VQEILHCLL-----DRH-----            |
| Tribolium_castaneum_37  | -----PLLRLMSLAPDPEMRL---VQKILHTLL-----DRH-----            |
| Anopheles_gambiae_38    | -----PLLKMARASIPIRII---VMQIFQQL-----DRH-----              |
| EFR3B_Ciona_intestin_39 | -----PLLKVAFSAQPGDRLL---AQSLLASLL-----DKN-----            |
| Tetraodon_nigrovirid_40 | -----PLFSISLMEDGELRQL---VLEILHNL-----DRH-----             |
| Solenopsis_invicta_41   | -----PLLRLMSLAADAEMRLL---VQKIFHTLI-----DRH-----           |
| Cryptococcus_neoform_0  | GSETATPNREKGVSVFKVTEPTPGETATQQTQ-----SGSGATTPPKRNRSRH     |
| Drosophila_melanogas_1  | ---QNEQVLLSSVS-VKPYPA---LSQEPP-----SRSDIFTHKY-----        |
| EFR3A_Equus_caballus_2  | ---DNRAKLRGIR-IIPDVADLKIKREKI-----CRQDTSFMKKN-----        |
| Neurospora_crassa_3     | ---DSLARDESARTTLKNRAQENNLARRVSSAS-----ARVDKSNAPR-----     |
| Debaryomyces_hanseni_4  | ---VTRNENMETG-AINSIESFNVGGDHL-----QPDYNNYISDP-----        |
| Saccharomyces_cerevi_5  | ---ILFSKLYS---LLRELDSHGVQKEMMEEIF-----DKYGMALLSG-----     |
| Ustilago_maydis_6       | AAAP-----IG---EKVSDAIGVVHAIGAAAHVMCLSKSLSPPAQVLGNLRESPLEL |
| Ascaris_suum_7          | ---DNLSSLQHPV-YVPDVADLQLTVEKC-----SRADQMFMQKH-----        |
| Harpegnathos_saltato_8  | ---RNITKLAKP---TVNVTELDLVEIEKA-----SRPDVIFIRKH-----       |
| Monodelphis_domestic_9  | ---DNRAKLRGIR-IIPDVADLKIKREKI-----SKQDASFMKKN-----        |
| Ailuropoda_melanoleu_10 | ---DNRAKLRGIR-IIPDVADLKIKREKI-----CRQDTSFMKKN-----        |
| Ashbya_gossypii_11      | ---MNFFFLFLVA-LESPGEQEKLLDDAF-----AKSKNFTL-----           |
| Nematostella_vectens_12 | ---NNSKNLGLNG-MLKDGKEIQLNVEKC-----PKQDLMFFQKY-----        |
| Acyrtosiphon_pisum_13   | ---NNASKLSNIF-YRVNITKSEINLEKC-----SRSDTIFIRKH-----        |
| Culex_quinquefasciat_14 | ---QNQHLLMNLIS--INNYPTLTVEQP-----SRSDILFTHKY-----         |
| Aedes_aegypti_15        | ---QNQHLLNMIS--VTNYPTLTVEQA-----SRSDILFTHKH-----          |
| Camponotus_floridanu_16 | ---RNIMKLAKP---TVNMVELGLVIEKA-----SRPDVIFIRKH-----        |
| Caenorhabditis_elega_17 | ---DNAANLVHLG-YELDVS DVQLTVEKC-----SRADQMFMKKN-----       |
| EFR3B_Homo_sapiens_18   | ---GNRHKFTSIS-TLSDISVLKLVKVDKC-----SRQDTSFMKKN-----       |
| EFR3A_Homo_sapiens_19   | ---DNRAKLRGIR-IIPDVADLKIKREKI-----CRQDTSFMKKN-----        |
| EFR3B_Ailuropoda_mel_20 | ---GNRHKFTSIS-TLSDISVLKLVKVDKC-----SRQDTSFMKKN-----       |
| Schizosaccharomyces_21  | ---TSQSPFVRIKTAEVFYEFLCFLRPSL-----INFDTILRKSAA--ITS       |
| EFR3A_Xenopus_laevis_22 | ---DNRAKLRGIR-IIPDVADLKIKREKI-----SKQDVNFMKKN-----        |
| EFR3A-Taeniopygia_gu_23 | ---DNRAKLRGIR-IIPDVADLKIKREKI-----SRQDVSFMKKN-----        |
| EFR3B_Danio_rerio_24    | ---DNLPKFSNIS-IISDISVLKLVKVDKC-----SRQDNLFMKKN-----       |
| Anopheles_darlingi_25   | ---QNQHLLNVI---SVNNYP-TLTIEQA-----SRSDILFTHKY-----        |
| EFR3B_Mus_musculus_26   | ---GNRHKFTSIS-TLGDISVLKLVKVDKC-----SRQDTSFMKKN-----       |
| Yarrowia_lipolytica_27  | ---FGNPDPRFQIGFGRG-----YQNQNAVYGFVS-----                  |

EFR3A\_Rattus\_norvegi\_28  
Gallus\_gallus\_29  
Kluyveromyces\_lactis\_30  
Ornithorhynchus\_anat\_31  
EFR3A\_Oryctolagus\_cu\_32  
Nasonia\_vitripennis\_33  
Candida\_glabrata\_34  
Ixodes\_scapularis\_35  
Daphnia\_pulex\_36  
Tribolium\_castaneum\_37  
Anopheles\_gambiae\_38  
EFR3B\_Ciona\_intestin\_39  
Tetraodon\_nigrovirid\_40  
Solenopsis\_invicta\_41

----DNRAKLRGIR-IIPDVADLKIKREKI-----CRQDTSFMKKN-----  
----DNRAKLRGIR-IIPDVSDLKIKRDKI-----SRQDVFSMFKKH-----  
----FIRFFEKVVSTLSKQDTEIAISTSA-----YYKAASL-----  
----DNRAKLRGIR-IIPDVADLKIKREKI-----SRQDASFMKKN-----  
----DNRAKLRGIR-IIPDVADLKIKREKI-----CRQDTSFMKKN-----  
----KNITKLAKP---TVNIIELDLAIEKA-----SRPDVIFIRKH-----  
----STLSRFLQ---MVRDIEDRNLQ-----SKAMSIIFDKYKKIIL-----  
----GNLDQLRSMPSCEGPLGLDLRL--EKC-----SRQDVFMRKH-----  
----ENRLKLLKP---CIDICGLNLVFDKC-----SRADSLFYKHN-----  
----QNLEKLTKP---TVNVSKLNLVLEKS-----SRPDLIFINKH-----  
----QNQHLLNVIN---VSHYPTLTITETP-----SRSDILFTHKY-----  
----KNYGKLLKLVSHQREVESLKLITSTA-----GKYDGDFLERR-----  
----DNRAKLRGIR-IIPNVAALKIKREKI-----TKQDVAFMFKKH-----  
----RNITKLAKP---TVNVVELDLAIEKA-----SRPDVIFIRKH-----

Cryptococcus\_neoform\_0  
Drosophila\_melanogaster\_1  
EFR3A\_Equus\_caballus\_2  
Neurospora\_crassa\_3  
Debaryomyces\_hanseni\_4  
Saccharomyces\_cerevisiae\_5  
Ustilago\_maydis\_6  
Ascaris\_suum\_7  
Harpegnathos\_saltator\_8  
Monodelphis\_domestica\_9  
Ailurophora\_melanoleuca\_10  
Ashbya\_gossypii\_11  
Nematostella\_vectens\_12  
Acyrtosiphon\_pisum\_13  
Culex quinquefasciatus\_14  
Aedes\_aegypti\_15  
Camponotus\_floridanus\_16  
Caenorhabditis\_elegans\_17  
EFR3B\_Homo\_sapiens\_18  
EFR3A\_Homo\_sapiens\_19  
EFR3B\_Ailurophora\_mel\_20  
Schizosaccharomyces\_21  
EFR3A\_Xenopus\_laevis\_22  
EFR3A-Taeniopygia\_gu\_23  
EFR3B\_Danio\_rerio\_24  
Anopheles\_darlingi\_25  
EFR3B\_Mus\_musculus\_26  
Yarrowia\_lipolytica\_27  
EFR3A\_Rattus\_norvegi\_28  
Gallus\_gallus\_29  
Kluyveromyces\_lactis\_30  
Ornithorhynchus\_anat\_31  
EFR3A\_Oryctolagus\_cu\_32  
Nasonia\_vitripennis\_33  
Candida\_glabrata\_34  
Ixodes\_scapularis\_35  
Daphnia\_pulex\_36  
Tribolium\_castaneum\_37  
Anopheles\_gambiae\_38  
EFR3B\_Ciona\_intestin\_39  
Tetraodon\_nigrovirid\_40  
Solenopsis\_invicta\_41

RPSLPL-----NRLQSYT-----HLSSFDNV--AT-PLDFAAALRILDMAMHVVP  
GANIMQ-----ALIDSMAL-----S-DRVDAL--TSSFNTAALLIVEMSCNETVQE  
GQQLYR-----HIYLGCKE-----EDNVQKNY--ELLYTSLALITIELANEEVVID  
SHFLQL-----LHLAIYDH-----ALQF--VDYENDLVLHVLAKLVSQLG  
GNFI-----AHFLGYVD-----KFFSGQSL--INID-NASLLQKVLKNMILILG  
---LNY-----FLENVS-E-----PEYTYYSY--HLQANFLKLDYKSQTEYKMQ  
LPQIDRINADPGRPGSLSSGGS-----GTPAAEST--AALPVDYVAVQALEHAVTALP  
VVAFTN-----MLYKSVCLVPERREGDMAEHI--DAILCTMALLCVEVVIDEVIIE  
GPEIYL-----ALYESLEL-----SSNTVDNV--ESIYTTLALLAIELASEETVLE  
GQQLYR-----HIYLGCKE-----DDNVQKNF--ELLYTSLALITIELANEEVVID  
GQQLYR-----HIYLGCKE-----EDNVQKNY--ELLYTSLALITIELANEEVVID  
LSGLIY-----FLE-----KGNTPSNL--YYCYHTKAARFLEFDDYHSQAQ  
HDQIIW-----YLYESASM-----RTNNVSNL--LAIYVTMATISTEMSEMEVISQ  
AQDIYV-----SIYESLEM-----TNNVENV--EAVYTTLALICIELLSEETVLD  
GSNILQ-----ALIDAMTQ-----E-NNMEIL--KPTYNTAGLMVEMACGETVQE  
GSNILQ-----AILDGMSQ-----E-NHMEVL--KSSYNTAGLMVEMACSETVQE  
GPEIYL-----ALYESLEL-----SSNTVENV--ESIYTTLALLAIELASEETILE  
IGEITY-----MLLRAVALAD--ENDLNKHI--DAVLCTMSLLCI--ESLIE  
SQQLYR-----HIYLGCKE-----ETNVQKHY--EALYGLLALISIELANEEVVD  
GQQLYR-----HIYLGCKE-----EDNVQKNY--ELLYTSLALITIELANEEVVID  
SQQLYR-----HIYLSCKE-----ETNIQKHY--EALYGLLALISIELANEEVVD  
FSVLWD-----FIYETSWH-----IERWLKVFVSQSEFYILKLIQRLYQLYGPVS  
GQQLYR-----HIYLGCKE-----DDNVHKNY--ELLYTTLALVTIELANEEVVID  
GQQLYR-----HIYLGCKE-----EDNVQKNF--ELLYTSLALTTIELANEEVVID  
AQHLYR-----HIYLSCKE-----QSSVQPHF--EKLYSLLALISMELANEEVVD  
GSNILQ-----AIYESLEL-----E-NHLEVL--KSSYNTIALVIVEMACGETVQE  
SQQLYR-----HIYLSCKE-----ETNIQKHY--EALYGLLALISIELANEEVVD  
HLSMQL-----NKLITNTR-----ATNGDF--LLGNSLLQNIIVIRLQDGVVAT  
GQQLYR-----HIYLGCKE-----EDNVQKNY--ELLYTSLALITIELANEEVVID  
GQQLYR-----HIYLGCKE-----EDNVQKNF--ELLYTSLALITIELANEEVVID  
LSGLAY-----YVN-----NNRPSDGY--YA-YHHHASKFLGLADYQTVQE  
GQQLYR-----HIYLGCKE-----EDNVQKNF--ELLYTSLALTTIELANEEVVID  
GQQLYR-----HIYLGCKE-----EDNVQKNY--ELLYTSLALITIELANEEVVID  
GPEIYM-----ALYESLEL-----TNNRVENV--EAIYTTLALLTVELASEETVLE  
LPGLNY-----FQM-NIKE-----PEYTYLY--HFNAAKTLGVTSYSETQKLD  
GPDILY-----HVVYNAQL-----ANNGPANF--QALFTTLALLCVELGSEDVLID  
GSRILV-----NLSESLEL-----TNVTRENI--EAIYCTAALVCVELATDEMLVD  
GPIIYD-----ALYTTLQM-----DSNTPDNV--EAVYTTLALLCVELASAEVVID  
GSNILQ-----AIYESLEL-----E-NHLEVL--KSSYNTIALVIVEMACGETVQE  
LPSIYN-----WLYSSYTL-----ETNTIANF--TSLYKCAAVLCLSVSHDVID  
GQQLYR-----HIYLGCKE-----EDNVHKNF--ELLYTTLALITIELANEDAIVD  
GPEIYL-----ALYESLEL-----SSNTVENV--ESIYTTLALLAIELASEETVLE

Cryptococcus\_neoform\_0  
Drosophila\_melanogaster\_1  
EFR3A\_Equus\_caballus\_2  
Neurospora\_crassa\_3  
Debaryomyces\_hanseni\_4  
Saccharomyces\_cerevisiae\_5  
Ustilago\_maydis\_6

VAAL---VTGAPMLLAVDRD-AGNELV-RR---PGDGR-----AGAW-----  
FLLF---ILGIQVACT-VD-TLGNVH-KC---SLHAI-----SIGL-L-----  
LIRL---AIALQDSAINED-NLPMFH-RC---GIMAL-----VAAAY-L-----  
VNAA---KFGIPMIFRLQED--IQDVE-TPLGKVRIGSL-----VHGY-LWTLTEKFD  
INFI---NNFVPPFFFYWQLP-LNPNLV-DD---NTRIK-----DTLGYTL-----  
TRTL---FTKEDLLSYSDT-GSNKYS-KK---GAQILLSRDNQISTSDL-----  
CSAA---LALTPLMLVALDKD-AGSRLT-VH---GATVN-----TG-----

Ascaris\_suum\_7  
Harpegnathos\_saltato\_8  
Monodelphis\_domestic\_9  
Ailuropoda\_melanoleu\_10  
Ashbya\_gossypii\_11  
Nematostella\_vectens\_12  
Acyrtosiphon\_pisum\_13  
Culex\_quinquefasciat\_14  
Aedes\_aegypti\_15  
Camponotus\_floridanu\_16  
Caenorhabditis\_elega\_17  
EFR3B\_Homo\_sapiens\_18  
EFR3A\_Homo\_sapiens\_19  
EFR3B\_Ailuropoda\_mel\_20  
Schizosaccharomyces\_21  
EFR3A\_Xenopus\_laevis\_22  
EFR3A-Taeniopygia\_gu\_23  
EFR3B\_Danio\_erio\_24  
Anopheles\_darlingi\_25  
EFR3B\_Mus\_musculus\_26  
Yarrowia\_lipolytica\_27  
EFR3A\_Rattus\_norvegi\_28  
Gallus\_gallus\_29  
Kluyveromyces\_lactis\_30  
Ornithorhynchus\_anat\_31  
EFR3A\_Oryctolagus\_cu\_32  
Nasonia\_vitripennis\_33  
Candida\_glabrata\_34  
Ixodes\_scapularis\_35  
Daphnia\_pulex\_36  
Tribolium\_castaneum\_37  
Anopheles\_gambiae\_38  
EFR3B\_Ciona\_intestin\_39  
Tetraodon\_nigrovirid\_40  
Solenopsis\_invicta\_41

LFRL---SFALQSIADVSSS-GFKGSK-RI---AVHNM-----VARY-L-----  
LLRL---VLSLQDLALTSQINLGL---KF---NLHAI-----VISL-L-----  
LIRV---AIALQDNAINED-NLPMFH-RC---AMMAL-----VAAY-L-----  
LIRL---AIALQDSAINED-NLPMFH-RC---GIMAL-----VAAY-L-----  
YKRQEREIFTRNDLVNYYSDPGCNRYA-EK---GLRIL-----  
LVPL---VFGFNQMMAMKEES-KISTAC-RC---ALHAV-----VAAF-L-----  
FIRL---ILSIQELAITNA--VLSTQQ-KF---HLHGL-----VISI-M-----  
FLLF---VLGVQQAIVT-EA-ELSPKH-RC---NLHSI-----AISL-L-----  
FLLF---VLSVQQVAVA-EV-ELSPKH-RC---NLHSI-----AISI-L-----  
LLRL---VLSLQDLALT-SG-QISLSL-KF---NLHAT-----VISL-L-----  
LFRL---SLALQQLALDSKQ-NFSDAK-RN---CIHNM-----VAKY-L-----  
LIRL---VLAVQDVAQVNEE-NLPVYN-RC---ALYAL-----GAAY-L-----  
LIRL---AIALQDSAINED-NLPMFH-RC---GIMAL-----VAAY-L-----  
LIRL---VLAVQDVAQVNEE-NLPVYN-RC---ALYAL-----GAAY-L-----  
VTAV---LPAMYRGLRPFEN-DPP---RC---IAEAV-----TAYY-I-----  
LIRV---AIALQDIAITNED-NLQMFN-RC---GIMGM-----VAAY-L-----  
LIRL---AIALQDIAIINED-NLPMFN-RC---GVMAL-----VAAY-L-----  
LIRV---ALALQDLALSSEE-NLPVYN-RC---AIHAL-----SSAY-L-----  
FLLF---ILGLQQAIVT-EV-ELSPKH-RC---NLHSI-----AISL-L-----  
LIRL---VLAVQDVAQVNEE-NLPTYN-RC---ALYAL-----GAAY-L-----  
FPHM---LKAHELGRALVT-----GQSESNTLAQGI I IEDI FTLYL-----  
LIRL---AIALQDSAINED-NLPMFH-RC---GIMAL-----VAAY-L-----  
LIRL---AIALQDVAIINED-NLPMFN-RC---GIMAL-----VAAY-L-----  
FKRKDNDIFTKEDLLNYYSDAGSNIYS-EK---GRDIL-----L-----  
LIRV---AIALQENAINNED-NLPMFH-RC---GIMAL-----TAAY-L-----  
LIRL---VIALQDSAINED-NLPMFH-RC---GIMAL-----VAAY-L-----  
LLRL---VMSLQDLALT-SI-QMNI AI-KF---NLHST-----VISL-L-----  
NGEL---FTKEELMKYKNA-NNTQFG-EK---GMQIL-----MSY-D-----  
LLRL---MFAIQELPTTGGGA-SLSTAQ-VA---SLHGL-----VAAF-L-----  
ILRW---ALAVQDVALTNT--MLHPTN-RI---SLHVV-----SLSI-F-----  
LLQL---VLGIQSLALNST--TLSTSQ-KF---NLHAL-----VISL-L-----  
FLLF---ILGVQQAIVT-EV-ELSPKH-RC---NLHSI-----AISL-L-----  
VTRI---MLAVQSVAVDSIS-NSGMTHFSC---GVLAS-----TSCC-L-----  
LIRL---AVALQEMALANEE-NLPMFN-RC---GVMAL-----VAAY-L-----  
LLRL---VLSLQDLALTSSQISLPL---KF---NLHAI-----VISL-L-----

Cryptococcus\_neoform\_0  
Drosophila\_melanogas\_1  
EFR3A\_Equus\_caballus\_2  
Neurospora\_crassa\_3  
Debaryomyces\_hanseni\_4  
Saccharomyces\_cerevi\_5  
Ustilago\_maydis\_6  
Ascaris\_suum\_7  
Harpegnathos\_saltato\_8  
Monodelphis\_domestic\_9  
Ailuropoda\_melanoleu\_10  
Ashbya\_gossypii\_11  
Nematostella\_vectens\_12  
Acyrtosiphon\_pisum\_13  
Culex\_quinquefasciat\_14  
Aedes\_aegypti\_15  
Camponotus\_floridanu\_16  
Caenorhabditis\_elega\_17  
EFR3B\_Homo\_sapiens\_18  
EFR3A\_Homo\_sapiens\_19  
EFR3B\_Ailuropoda\_mel\_20  
Schizosaccharomyces\_21  
EFR3A\_Xenopus\_laevis\_22  
EFR3A-Taeniopygia\_gu\_23  
EFR3B\_Danio\_rerio\_24  
Anopheles\_darlingi\_25  
EFR3B\_Mus\_musculus\_26  
Yarrowia\_lipolytica\_27  
EFR3A\_Rattus\_norvegi\_28

-----VLERKRAIRELVSLV-----WRRIA  
-----VLSIRVSGINNLEIYA-----QKIVD  
-----NFVSQMI AVPAFCQHV-----SKVIE  
EGTAPGSAIHGEI IRRRSKNFVVEGINIPAPAVDLVGTGPGQARP-----PPQMN  
-----IYHSLIKMDKIYELNYVRESEFFNSL-----LGDIN  
-----LSDSQVVRTTPLYEKNV-----PNAIF  
-----LENQRRLSSRMVA-----ARVLA  
-----NLSSQLMAIPSLCQHV-----QQVVK  
-----VLSIYACNITALMDYA-----KKVVE  
-----NFLSQMI AVPAFCQHV-----SKVIE  
-----NFVSQMI AVPAFCQHV-----SKVIE  
-----ISQNTRVST-----TDLTE  
-----ILAAQLLRLETLSDYA-----EEVYE  
-----LLVAIVTDLHPLKDYV-----EKVIE  
-----ILIGRCTGISTLVEYA-----EKVIQ  
-----ILIGRCTGIGPLVEYA-----EKVIQ  
-----VLSIYVCNITVLMDYA-----EKVVD  
-----NLSAQLIANPSLCQQV-----QHVVS  
-----NLISQLTTVPFCQHI-----HEVIE  
-----NFVSQMI AVPAFCQHV-----SKVIE  
-----NLISQLTTVPFCQHI-----REVIE  
-----IYIGENLKIITTLQSSG-----RKWLD  
-----NFLSQMI AVPAFCQHV-----SKVIE  
-----NFLSQMI AVPAFCQHV-----SKVIE  
-----NLISQLTTVPFCQHV-----HEVIE  
-----ILLARCTAIGTLVEYA-----EKLIE  
-----NLISQLTTVPFCQHI-----HEVIE  
-----KQVGDVSDAADLTVQA-----GDEVA  
-----NFVSQMI AVPAFCQHV-----SKVIE

Gallus\_gallus\_29 -----NFLSQMIAVPSFCQHV-----SKVIE  
 Kluyveromyces\_lactis\_30 -----VDHSDQNGTDIDQDTV-----  
 Ornithorhynchus\_anat\_31 -----NFLSQMIAVPAFCQHV-----SKVIE  
 EFR3A\_Oryctolagus\_cu\_32 -----NFVSQMIAVPAFCQHV-----SKVIE  
 Nasonia\_vitripennis\_33 -----VLIANVCNISTLIDYA-----NKIVE  
 Candida\_glabrata\_34 -----NQISN-----SDLLN  
 Ixodes\_scapularis\_35 -----FLAAQLTSIPSLNAHV-----NEVLK  
 Daphnia\_pulex\_36 -----NLASHTMNVATLIEYS-----AQVVA  
 Tribolium\_castaneum\_37 -----VLIPSVVTIPPLLEYA-----NQIVE  
 Anopheles\_gambiae\_38 -----ILLGRCTGVGPLVEYV-----EKLIQ  
 EFR3B\_Ciona\_intestin\_39 -----LILAHVSAVPEFQHYV-----NQVIH  
 Tetraodon\_nigrovirid\_40 -----NFLSQM-----VIE  
 Solenopsis\_invicta\_41 -----VLISYVCNITALMDYATKVGSLKFYDVLKIKCAMNTKVIE

Cryptococcus\_neoform\_0 DRWGIVEIDDLANKALAS-----LPEPYLIP-----PYPVPD-----S  
 Drosophila\_melanogas\_1 ARR-----EEASHFLP-----PLLEP-----K  
 EFR3A\_Equus\_caballus\_2 IRT-----MEAPYFLP-----EHIFRD-----K  
 Neurospora\_crassa\_3 MRD-----LESEALLP-----FDERASLVDCICTGYQEL  
 Debaryomyces\_hanseni\_4 YRK-----LNKLWVNGLQSKEDAVLD-----N  
 Saccharomyces\_cerevi\_5 SNG-----KAVYDNN-----DFAAQ-----N  
 Ustilago\_maydis\_6 KLGETFDTDSVSRAAQGVLSQIPSLGIEPGSPVGGTLTP-----SEVVPFSAV  
 Ascaris\_suum\_7 ERA-----VRGHLSSL-----NLMAEG-----N  
 Harpegnathos\_saltato\_8 ARR-----NDSPHLLP-----DLQSQY-----D  
 Monodelphis\_domestic\_9 IRT-----MEAPYFLP-----EHIFRD-----K  
 Ailuropoda\_melanoleu\_10 IRT-----MEAPYFLP-----EHIFRD-----K  
 Ashbya\_gossypii\_11 TPP-----EGLQIP-----D  
 Nematostella\_vectens\_12 MFK-----  
 Acyrthosiphon\_pisum\_13 QRKL-----LSATHLLP-----ELSVHN-----  
 Culex\_quinquefasciat\_14 ARM-----EEATYLLP-----PLLDNE-----K  
 Aedes\_aegypti\_15 SRT-----EDAPYLLP-----PLLDNE-----K  
 Camponotus\_floridanu\_16 ARR-----KDSPHLLP-----DLQSQY-----D  
 Caenorhabditis\_elega\_17 CRAQ-----RGIPGLNLLLNVKDSPNND-----D  
 EFR3B\_Homo\_sapiens\_18 TRK-----KEAPYMLP-----EDVFVE-----R  
 EFR3A\_Homo\_sapiens\_19 IRT-----MEAPYFLP-----EHIFRD-----K  
 EFR3B\_Ailuropoda\_mel\_20 TRK-----KEAPYMLP-----EDVFVE-----R  
 Schizosaccharomyces\_21 SLS-----SSLPSLLNRGSSTHSWEK-----  
 EFR3A\_Xenopus\_laevis\_22 TRN-----MDATYFLP-----EVIFRD-----K  
 EFR3A-Taeniopygia\_gu\_23 TRS-----VEAAYFLP-----ETIFKD-----K  
 EFR3B\_Danio\_rerio\_24 MRQ-----KEIPYLLP-----EDVFIE-----N  
 Anopheles\_darlingi\_25 ARR-----EEASYLLP-----PLMDND-----K  
 EFR3B\_Mus\_musculus\_26 TRK-----KEAPYMLP-----EDVFVE-----K  
 Yarrowia\_lipolytica\_27 LRK-----KLGWLP-----N  
 EFR3A\_Rattus\_norvegi\_28 TRT-----MEAPYFLP-----EHIFRD-----K  
 Gallus\_gallus\_29 TRS-----LEASYFLP-----ETIFKD-----K  
 Kluyveromyces\_lactis\_30 --R-----YSTPIPLP-----QISIPP-----T  
 Ornithorhynchus\_anat\_31 TRT-----EEAPYFLP-----EHIFKD-----K  
 EFR3A\_Oryctolagus\_cu\_32 IRT-----MEAPYFLP-----EHIFRD-----K  
 Nasonia\_vitripennis\_33 SRS-----KEATHLLP-----DLRSQY-----D  
 Candida\_glabrata\_34 DRP-----LSP-----VFSS-----K  
 Ixodes\_scapularis\_35 VRR-----ERAPHLLP-----Q  
 Daphnia\_pulex\_36 ART-----AKAPLLLR-----FNE-----G  
 Tribolium\_castaneum\_37 ART-----QEAPHLLP-----DLMVH-----Y  
 Anopheles\_gambiae\_38 ARK-----EEASYLLP-----PLMDND-----K  
 EFR3B\_Ciona\_intestin\_39 ARE-----KFALQFLP-----KNALDS-----H  
 Tetraodon\_nigrovirid\_40 LRS-----MRAPYLLP-----EHIFRD-----K  
 Solenopsis\_invicta\_41 ERR-----NDSPHLLP-----DLQSQY-----D

Cryptococcus\_neoform\_0 PP---VFLSLPEEP-----VSFIQHTLEGESS-TAKPLLDQDTLLDALVKSQ  
 Drosophila\_melanogas\_1 KL---AGKTFNLQLPH-----LAIDKLALGECLQN-AGMD-AQRLNTGAPY---  
 EFR3A\_Equus\_caballus\_2 CM---LPKSLEKHKDN-----LYFLTNKIAESLGG-SGYS-VERLSV--PY---  
 Neurospora\_crassa\_3 AT---SPPTSPTSPG-----RNFTHPMLGSTLSA-TPKD-ETQREV-----  
 Debaryomyces\_hanseni\_4 HH--ALGHRDENGTLR-----FNPTKKNLEDFVIG-NAFT-LSWINPHRPLIIDI  
 Saccharomyces\_cerevi\_5 KFDNSIDDNIEANDT-----VISDANAKGSIYRF-VAED-ARSWKTMTRAT---  
 Ustilago\_maydis\_6 GSIINQLGESSSSSSPS-----LNGALVINSLASSSKLQSATQLDAATLKRWLE  
 Ascaris\_suum\_7 AMGTYNAGATSNEEEHAAVGLLEEDASLLFDKNDVAEMLKA-SGKD-VQRFAI--PF----



Harpegnathos\_saltato\_8  
Monodelphis\_domestic\_9  
Ailuropoda\_melanoлеu\_10  
Ashbya\_gossypii\_11  
Nematostella\_vectens\_12  
Acyrtosiphon\_pisum\_13  
Culex\_quinquefasciat\_14  
Aedes\_aegypti\_15  
Camponotus\_floridanu\_16  
Caenorhabditis\_elega\_17  
EFR3B\_Homo\_sapiens\_18  
EFR3A\_Homo\_sapiens\_19  
EFR3B\_Ailuropoda\_mel\_20  
Schizosaccharomyces\_21  
EFR3A\_Xenopus\_laevis\_22  
EFR3A-Taeniopygia\_gu\_23  
EFR3B\_Danio\_rerio\_24  
Anopheles\_darlingi\_25  
EFR3B\_Mus\_musculus\_26  
Yarrowia\_lipolytica\_27  
EFR3A\_Rattus\_norvegi\_28  
Gallus\_gallus\_29  
Kluyveromyces\_lactis\_30  
Ornithorhynchus\_anat\_31  
EFR3A\_Oryctolagus\_cu\_32  
Nasonia\_vitripennis\_33  
Candida\_glabrata\_34  
Ixodes\_scapularis\_35  
Daphnia\_pulex\_36  
Tribolium\_castaneum\_37  
Anopheles\_gambiae\_38  
EFR3B\_Ciona\_intestin\_39  
Tetraodon\_nigrovirid\_40  
Solenopsis\_invicta\_41

Cryptococcus\_neoform\_0  
Drosophila\_melanogaster\_1  
EFR3A\_Equus\_caballus\_2  
Neurospora\_crassa\_3  
Debaryomyces\_hanseni\_4  
Saccharomyces\_cerevisiae\_5  
Ustilago\_maydis\_6  
Ascaris\_suum\_7  
Harpegnathos\_saltato\_8  
Monodelphis\_domestic\_9  
Ailuropoda\_melanoлеu\_10  
Ashbya\_gossypii\_11  
Nematostella\_vectens\_12  
Acyrtosiphon\_pisum\_13  
Culex\_quinquefasciat\_14  
Aedes\_aegypti\_15  
Camponotus\_floridanu\_16  
Caenorhabditis\_elega\_17  
EFR3B\_Homo\_sapiens\_18  
EFR3A\_Homo\_sapiens\_19  
EFR3B\_Ailuropoda\_mel\_20  
Schizosaccharomyces\_21  
EFR3A\_Xenopus\_laevis\_22  
EFR3A-Taeniopygia\_gu\_23  
EFR3B\_Danio\_rerio\_24  
Anopheles\_darlingi\_25  
EFR3B\_Mus\_musculus\_26  
Yarrowia\_lipolytica\_27  
EFR3A\_Rattus\_norvegi\_28  
Gallus\_gallus\_29

AA---LTSRLAPA-----LLVDQTVVSECLKG-AGLD-SGKLOQGSY----  
CM---LPKSLEKHEKN-----LYFLTNKIAESLGG-SGYN-VEKLTV--PY----  
CM---LPKSLEKHDKN-----LYFLTNKIAESLGG-SGYS-VERLSV--PY----  
IP---LPPTPPTPQQH-----RMFLNSD-----ASVKS LDKMK-----  
-----KAGCDYK GIR-----VAYEHQELSGVLAR-T-----  
-----EVKSSSLLPAG-----VLIEEPTELTEALKA-SGID-ITTETG--PV----  
SA----PSTLNTNLPH-----LMVDKLAIAECLQQ-AGLE-HSRVQTGTPY----  
PA----PSTLNTNQPH-----LMIDKLAVAECLQQ-AGLE-HNRVQTGTPYSLNQ  
AA---LTSRLTPA-----VLVDQTVVSECLKG-VGLD-SGKLOQGSY----  
PL---SSSALNSTSQGATTITEEDQTLLEFNAEDIAESLKA-SGKD-ATRLFV--PFNFM  
PR---LSQNL DGVVIE-----LLFRQSKI SEVLGG-SGYN-SDRLCL--PY----  
CM---LPKSLEKHEKD-----LYFLTNKIAESLGG-SGYS-VERLSV--PY----  
PR---LSQNL DGVVMD-----FLFRQSKI SEVLGG-SGYN-SDRLCL--PY----  
-----LTNASTE EV-----MLPLDMVVNELLEK-SPKVPEDSRL--LF----  
CS---LPKSLDKHEKN-----QIFLTN KIAESLGG-SGYN-VEKLSM--PY----  
VN---LPKSLEKDETD-----LFFLTN KIAESLGG-SGYN-VERLSV--PY----  
PK---IPK TLEKLEGD-----VLFQQA KITEVLGG-SGYN-TERLAT--PY----  
SA----PSTLNTNLPH-----LLIDKLA AAECLQQ-AGLE-SNRVQTG TLY----  
PR---LSQNL DGVVIE-----FLFRQSKI SEVLGG-SGYN-SDRLCL--PY----  
YLDWPVSSSSRIQDAD-----AQIDTSMVAKMKT L-SRSE-VEGLFA--EY----  
CM---LPKSLEKHDKN-----LYFLTNKIAESLGG-SGYS-VERLSV--PY----  
CN---LPKSLEKHEKN-----LFFLTN KIAESLGG-SGYS-VERLSV--PY----  
TT---NGIGIKKSSPA-----NDTYVTRSLKH----N-----P-----  
CL---LPKSLEKHEKK-----LFFLTN KIAESLGG-SGYS-VEKLSV--PY----  
CM---LPKSLEKHEKN-----LYFLTNKIAESLGG-SGYS-VERLSV--PY----  
PH---LPSRIPTA-----LIVDQTI VTECLKG-VGLE-TGKLOQGSY----  
PL----SSPMGLIS PQ-----AQTNTQLNQPMRF-VSDD-VHSWKVSRPS----  
PG---RPASPGTVPEA-----ALFDRAAVGEALRS-TGHD-TSKLFTQMLY----  
SA---EEFPQDGIPPE-----CLLDFNTIADCMKE-AGKDIMGMIPLQGPF----  
PQ----DSEVANKVPH-----LLVDQMAVCENLKS-GGID-PSRLAQ TSPY GAGG  
SA----PSTLNTNLPH-----LLVDKLA VAECLQQ-AGLE-CNRVQTGTPY----  
VN---HKPQKLSPENAEK-----VYFNSSEIYNALKGRSGYN-IEKLTR--PF----  
CAVSPLPDSLEKDDQL-----LLFQSTDMAECLAG-PGYN-VEKLSI--PY----  
TG---LTSRLAPA-----LLVDQTVVSECLKG-AGLD-SGKLOQGSY----

TVQAAKQMD EAGLKR LFDGKWSVEQAIKDSMERFSSANLRPDDSHYNAASALL---MS  
----SLNQT-----DHPGHRHSWVESVSNQL-----TQRNSSADLTVYNG--D-VD  
----VPQVT-----DEDRL-----SRRKSI VDTVSIQV--D-IL  
----PAQFRELMGLDWTREAVLANTQAGSSQTASLNGTNGTHRNTVNNNNR LGV--NGVT  
VNNYIPKKE-----NNQNVLSDM-----SDESSIIENSSYHT-----S  
----APKVS DLKKT MNEKNI PNMKRDG SFRGSQ-----SVKSRVNTITFLN--E-LK  
RDWNVGI AVDEAFAGSSPYAHSS LGTGSQQA-----SRRPSYTPINGLSAGGNAFV  
----VTKGNLLAVGDG SQNDGGSSRAATDKTDNFSGMAN-GAAQSILDESALSI--D--M  
-----SNNSLQHRHSWVDNAGRNSLADINSGGT--E-LD  
----VPQVT-----DEDRL-----SRRKSI VDTVSIQV--D-IL  
----VPQVT-----DEDRL-----SRRKSI VDTVSIQV--D-IL  
---SPKVS-----DLKRA-----ARGIRVAPSHS-----SLRA  
-----LAHRRSWV-----ENTNM-----SMKGSFTDLSNLDL--D--  
----SLHQ T-----DMSAHRHSWVD TSS-----AARN SIVDANYN--D-IE  
TDMSAHRHS-----WVDTS-----APRNSIVDANY-----D-AE  
-----SSNSLQHRHSWVDSAGRNSLADINSGGQ--E-LD  
----NGRKN DGS GDQWQNDTPNFDSTDGRES-----PSGYKTVGID DVSV--D--M  
----IPQLT-----DEDRL-----SKRRSIGETISLQV--E-VE  
----VPQVT-----DEDRL-----SRRKSI VDTVSIQV--D-IL  
----IPQLT-----DEDRL-----SKRRSIGETISLQV--E-VE  
----AEQSR-----HPKYTDIIQK LKPKSREKSF TSSSEYSL--PFIS  
----VPQVT-----DEDRL-----SRRKSI VDTI SIQV--D-IL  
----VPQVT-----DEDRL-----SRRKSI VDTVSIQV--D-IL  
----VPQFT-----DEDRL-----SKRRSIGETISLQV--E-VD  
---ALNQT-----DISAHRHSWVD THS-----TVRNSVVDSSYNEI--E--  
----IPQLT-----DEDRL-----SKRRSIGETISLQV--E-VE  
----VTSMP-----QE-----TRAE LFS DYDDVMT---IH  
----VPQVT-----DEDRL-----SRRKSI VDTVSIQV--D-IL  
----VPQVT-----DEDRL-----SRRKSI VDTVSIQV--D-IL

Kluyveromyces\_lactis\_30 ----VPNVK-----DLKNLV-----SSKKDKSNTKTLRG-----  
 Ornithorhynchus\_anat\_31 ----VPQVT-----DEDRL-----SRRKSIVDTVSIQV--D-IL  
 EFR3A\_Oryctolagus\_cu\_32 ----VPQVT-----DEDRL-----SRRKSIVDTVSIQV--D-IL  
 Nasonia\_vitripennis\_33 -----SSSALQHRHSWVDSAGRSSLGDIINGTT--E-LD  
 Candida\_glabrata\_34 ----IPKVSDLKKAMKNGSSTKNKPLRGSQ-----SVKSRVTNITFLLS--E--L  
 Ixodes\_scapularis\_35 ----LARPS----APSPGVPSDWAQCAGEP-----TVTRSVSDLNSNNV--E-VA  
 Daphnia\_pulex\_36 ----NANQR-----YSWADSSL-----HQPSSFDTLSNLNL--DGSE  
 Tribolium\_castaneum\_37 PGVVIGGQR-----NSWIE-----TARGSVIDINAPPE---VD  
 Anopheles\_gambiae\_38 ----ALNQT-----DISAHRHSWVDTHS-----AVRNSVVDASYNDI--E---  
 EFR3B\_Ciona\_intestin\_39 ----QANLQ-----MDTLS-----SDAQRSIDVESINI--EFSV  
 Tetraodon\_nigrovirid\_40 ----VPQVTVLYTVGKILHRCKQTSRDEDRL-----TRRKSFVDTVSLQV--D-IM  
 Solenopsis\_invicta\_41 -----SGNSLQHRHSWVD-AGRNSLADINSNGGA--E-LD

Cryptococcus\_neoform\_0 MNNASYQSVNGQ-----RLSRTI-----D  
 Drosophila\_melanogas\_1 SVSSSPGVCKKL-----LAPEF-----N  
 EFR3A\_Equus\_caballus\_2 PNSVPSDDVVS-----NTEEI-----T  
 Neurospora\_crassa\_3 SPNGSNSNLRPSSSPTGPNQVQAGRTRKTSIRSNGGGGSPAHSSTYRAKAQQPVT---S  
 Debaryomyces\_hanseni\_4 ARQNGFGLGLG-----NANDI-----  
 Saccharomyces\_cerevi\_5 TFSDDANKIKDP-----DEENIV-----G  
 Ustilago\_maydis\_6 NGSNASSASVN-----KNSRI-----S  
 Ascaris\_suum\_7 SIDWSPESRLA-----SRRNTFFAVSRDRDNVLLALPLT  
 Harpegnathos\_saltato\_8 SGGSSPGVQKKL-----PGEEL-----T  
 Monodelphis\_domestic\_9 PGSNPIDNMVST-----TTEEI-----T  
 Ailuropoda\_melanoleu\_10 PNSIPSDDVVS-----NTEEI-----T  
 Ashbya\_gossypii\_11 SQSVKSRVTNIT-----FLLNEL-----N  
 Nematostella\_vectens\_12 -GQPSSGGTRPS-----TPMEHI-----T  
 Acyrthosiphon\_pisum\_13 SVNSTPAMQRRF-----SPNEDL-----S  
 Culex\_quinquefasciat\_14 SVSSSPGVQKRS-----LASEF-----N  
 Aedes\_aegypti\_15 SVSSSPGVQKRS-----LPVDF-----N  
 Camponotus\_floridanu\_16 SGGSSPSVQKKL-----PGEEL-----T  
 Caenorhabditis\_elega\_17 SVDWTPPVSRKQ-----SRRNTIFSIVNPPKLNAS---T  
 EFR3B\_Homo\_sapiens\_18 SRNSPEKEERV-----PAEEI-----T  
 EFR3A\_Homo\_sapiens\_19 SNNVPSDDVVS-----NTEEI-----T  
 EFR3B\_Ailuropoda\_mel\_20 SRNSPEKEERV-----PAEEI-----T  
 Schizosaccharomyces\_21 PASDYQQNPLLH-----ATKSLVSI-----H  
 EFR3A\_Xenopus\_laevis\_22 SGSNTEDKV-----NTEEI-----T  
 EFR3A-Taeniopygia\_gu\_23 SGNNTEDKVD-----NTEEI-----T  
 EFR3B\_Danio\_rerio\_24 SRNSPEKEERT-----PAEEI-----T  
 Anopheles\_darlingi\_25 SVSSSPGVQKRS-----LASEY-----N  
 EFR3B\_Mus\_musculus\_26 SRNSPEKEERV-----PAEEI-----T  
 Yarrowia\_lipolytica\_27 SRQQVPDENLIVG-----K  
 EFR3A\_Rattus\_norvegi\_28 SNSVPSDDVVS-----NTEEI-----T  
 Gallus\_gallus\_29 PGNNTEDKID-----NTEEI-----T  
 Kluyveromyces\_lactis\_30 SQSVKSKVTNIT-----FLLDEL-----K  
 Ornithorhynchus\_anat\_31 PGNTADDTVS-----STEEI-----T  
 EFR3A\_Oryctolagus\_cu\_32 PNSIPPDDVAN-----NTEEI-----T  
 Nasonia\_vitripennis\_33 SAGSSPGVQRKL-----PGEEL-----T  
 Candida\_glabrata\_34 RSTTAGDDSHII-----DPDEE-----V  
 Ixodes\_scapularis\_35 SVNSSPGFVRKH-----PEEEI-----T  
 Daphnia\_pulex\_36 SNTSSPGVSRRY-----AEEEV-----T  
 Tribolium\_castaneum\_37 SVSSSPGVQRKM-----VEEEL-----T  
 Anopheles\_gambiae\_38 SVSSSPGVQKRS-----LASEY-----N  
 EFR3B\_Ciona\_intestin\_39 DKQQSVVMEGT-----MSAENI-----T  
 Tetraodon\_nigrovirid\_40 SSSLPDKSQ-----LAEEI-----T  
 Solenopsis\_invicta\_41 SGGSSPGVQKKL-----PGEEL-----T

Cryptococcus\_neoform\_0 VTDLRDALGGRVDTVSTSGAPSIASFDDSFHS--QSAPRSSL-----QSRRM  
 Drosophila\_melanogas\_1 FDAMKRAL---AEP----TEAAKREQRERQM--QIVR--TF-----REGGF  
 EFR3A\_Equus\_caballus\_2 FEALKKAI---DT----SG-MEEQEKEKRR--LVIE--KF-----QKAPF  
 Neurospora\_crassa\_3 VEQLKAVLSGHLQPPPTSHGINFQHSDDSDS--LVSY--DMAPSELSFNPAASGSRQGS  
 Debaryomyces\_hanseni\_4 -SSIHSGLLFHQSQNVNMKNAFSNGNETSNGS-----IY-----TSDRQ  
 Saccharomyces\_cerevi\_5 LDKIDVAR---SNS-----LRLAPISLSLDRS---SIG-----NRKSF  
 Ustilago\_maydis\_6 MQAPSTGV---ND-----LREALGTAAS--L-----SSKQA  
 Ascaris\_suum\_7 VEALRHMI---SAP-----VDAGEEERREQERTHEILE--KF-----RNRPF  
 Harpegnathos\_saltato\_8 FESMKRIL---TEN-----NN-NHTVEEEKRI--QLSE--FF-----RNAPF

Monodelphis\_domestic\_9  
Ailuropoda\_melanoleu\_10  
Ashbya\_gossypii\_11  
Nematostella\_vectens\_12  
Acyrtosiphon\_pisum\_13  
Culex\_quinquefasciat\_14  
Aedes\_aegypti\_15  
Camponotus\_floridanu\_16  
Caenorhabditis\_elega\_17  
EFR3B\_Homo\_sapiens\_18  
EFR3A\_Homo\_sapiens\_19  
EFR3B\_Ailuropoda\_mel\_20  
Schizosaccharomyces\_21  
EFR3A\_Xenopus\_laewis\_22  
EFR3A-Taeniopygia\_gu\_23  
EFR3B\_Danio\_rerio\_24  
Anopheles\_darlingi\_25  
EFR3B\_Mus\_musculus\_26  
Yarrowia\_lipolytica\_27  
EFR3A\_Rattus\_norvegi\_28  
Gallus\_gallus\_29  
Kluyveromyces\_lactis\_30  
Ornithorhynchus\_anat\_31  
EFR3A\_Oryctolagus\_cu\_32  
Nasonia\_vitripennis\_33  
Candida\_glabrata\_34  
Ixodes\_scapularis\_35  
Daphnia\_pulex\_36  
Tribolium\_castaneum\_37  
Anopheles\_gambiae\_38  
EFR3B\_Ciona\_intestin\_39  
Tetraodon\_nigrovirid\_40  
Solenopsis\_invicta\_41

FEALKKAI---DT-----NG-MEEQEKEKRR--LVIE--KF-----QKAPF  
FEALKKAI---VDT-----SG-MEEQEKEKRR--LVIE--KF-----QKAPF  
NESQETGI---YDPEEEVVG-LEKTDLARSISAKVSPAIA---SSKRFNG  
FQILKGII-----SDRQHVNGTN--IESP--KF-----AESSF  
FEAMKRSL---LDN-----PV-VRVEQNTROT--QLCD--MF-----RNTSF  
FESMKRVL---AEP-----TEASKREAREKQA--AIGR--TF-----RETAF  
FESMKRVL---AEP-----TEANKREAREKQA--AIGR--TF-----RETAF  
FESMKRIL---TEN-----NN-NYIVEEEKRM--QLSQ--FF-----RNAPF  
VDDLKAYA---NAT-----FDPIEEGRKEKELTGSILS--EI-----RNTDF  
YETLKKAI---VDS-----VA-VEEQERERRR--QVVE--KF-----QKAPF  
FEALKKAI---DT-----SG-MEEQEKEKRR--LVIE--KF-----QKAPF  
YETLKKAI---VDS-----VA-VEEQERERRR--QVVE--KF-----QKAPF  
QQSQRGEM-----VSTLQALS RPHTASTVV-----RSPSE  
FESLKKAI---DN-----TG-MEEQEKEKRR--LVIE--KF-----QKAPF  
FEALKKAI---DN-----SG-LEEQEKEKRR--LVIE--KF-----QKAPF  
FETLKNAI---VDS-----VG-VEEQEKERRR--QVVE--KF-----QKAPF  
FESMKRVL---AEP-----TEATKREAREKQM--QIGR--AF-----RETAF  
YETLKKAI---VDS-----VA-VEEQERERQR--QVVE--KF-----QKAPF  
ARSLKQLN-----AG-----SILE-----RQTM  
FEALKKAI---DT-----NG-MEEQEKEKRR--LVIE--KF-----QKAPF  
FEALKKAI---DN-----NG-LEEQEKEKRR--LVIE--KF-----QKAPF  
NDGDEIKI---ADPDEEDIIG-MEKQDLARSYSLRMNTISST-----NSRTL  
FEALKKAI---DT-----NG-LEEQEKEKRR--LVIE--KF-----QKAPF  
FEALKKAI---DT-----SG-MEEQEKEKRR--LVIE--KF-----QKAPF  
FDSMKRIL---TET-----NN-TQILEEEKRA--QLSQ--LF-----RNAPF  
VGIDKMEI---ARS-----LS-----GRGRNS--VVVE--DV-----STNRASF  
VESLKKLM---QEP-----PP-SQEAQEERL--AVLD--RF-----RHTPF  
FEALKKVL---AEP-----AESRREAIEYKQ--VICE--KF-----RNTPF  
FESMKKVL---TES-----VEIRKEAEARRR--QLSD--TF-----RTATF  
FESMKRVL---AEP-----TEASKREAREKQM--QIGR--TF-----RETAF  
YEYLKQVF---YKP-----PMSKEERLAKQKK--LAD--HI-----RSAPF  
FETLKKAI---DT-----TG-LEEQERERRR--QVME--KF-----QKAPF  
FESMKRIL---TEN-----NN-NQVVEEEKRM--QLSQ--FF-----RNAPF

Cryptococcus\_neoform\_0  
Drosophila\_melanogas\_1  
EFR3A\_Equus\_caballus\_2  
Neurospora\_crassa\_3  
Debaryomyces\_hanseni\_4  
Saccharomyces\_cerevi\_5  
Ustilago\_maydis\_6  
Ascaris\_suum\_7  
Harpegnathos\_saltato\_8  
Monodelphis\_domestic\_9  
Ailuropoda\_melanoleu\_10  
Ashbya\_gossypii\_11  
Nematostella\_vectens\_12  
Acyrtosiphon\_pisum\_13  
Culex\_quinquefasciat\_14  
Aedes\_aegypti\_15  
Camponotus\_floridanu\_16  
Caenorhabditis\_elega\_17  
EFR3B\_Homo\_sapiens\_18  
EFR3A\_Homo\_sapiens\_19  
EFR3B\_Ailuropoda\_mel\_20  
Schizosaccharomyces\_21  
EFR3A\_Xenopus\_laewis\_22  
EFR3A-Taeniopygia\_gu\_23  
EFR3B\_Danio\_rerio\_24  
Anopheles\_darlingi\_25  
EFR3B\_Mus\_musculus\_26  
Yarrowia\_lipolytica\_27  
EFR3A\_Rattus\_norvegi\_28  
Gallus\_gallus\_29  
Kluyveromyces\_lactis\_30

NKDS-----DVKEILKDFKDKK-----KGTKAP---  
DDLRRTEPKHD--LIQNRNLNLFNSL-----AVERQI---  
EEIAAQCESKAN--LLHDLRAQILELTV-----RPPSP---  
PGNTSQAASSPRTSQDRTOQLKF-----GGPLVP---  
YNTPRVSDLKDS--VLMKKKPGV-----  
LQKTATGENQND--DFKDANEDLHSL-----  
NGTTQDGSLSSTDRASRES-----RRGP---  
DELVEHVHNEEETDLSRTLHRLMORS-----  
QDLVSKTQPKHD--VLQSKLSEIFNTL-----SVDPRN---  
EEIAAQCESKAN--FLHDLRAQILELTI-----RPPSP---  
EEIAAQCESKAN--LLHDLRAQILELTI-----RPPSP---  
LTSSLDLELQED--AFQDASGEIE-----  
NEIADIASYQLQ--EFNSKLDNVLEAAL-----IPLTTS---  
QDLVAISTASKDEESLHSKITDVFNKV-----  
EDLVRRTPEPKHD--VIQDKLNEIFNSLS-----TERQIGSCAGQ  
EDLVRRTPEPKHD--VLQKNLNEIFNSLS-----AERQIN---  
QDLVSKTQPKHD--VLQSKLSEIFNTL-----SVEPRN---  
EERVNTNESLNEKSDLSKSIARLLVR-----  
EEIAAHCGARAS--LLQSKLNQIFEITI-----RPPSP---  
EEIAAQCESKAN--LLHDLRAQILELTI-----RPPSP---  
EEIAAHCGARAS--LLQSKLNQIFEITI-----RPPSP---  
INLRTQTSNRVP--LLDMLNLNRA-----  
EEIAAQCESKAN--LLHDKLAQILELTI-----RPPSP---  
EEIAAQCESKAN--LLHDLRAQILELTI-----RPPSP---  
EEIAAHCGARAT--MLQSKLNQIFEITI-----RPPSP---  
EDLVRRTPEPKHD--VIQKNLNEIFTALS-----AERQISCGIQ-  
EEIAAHCGARAS--LLQSKLNQIFEITI-----RPPSP---  
RDGWLGDVVKNN--KFAERKGFPT-----  
EEIAAQCESKAN--LLHDLRAQILELTI-----RPPSP---  
EEIAAQCESKAN--LLHDLRAQILELTI-----RPPSP---  
IPSVENAEHGD--DFRDAHEDIE-----

Ornithorhynchus\_anat\_31 EEIAAQCESKAN--LLHDLRAQIILELTI-----RPPSP---  
EFR3A\_Oryctolagus\_cu\_32 EEIAAQCESKAN--LLHDLRAQIILELTI-----RPPSP---  
Nasonia\_vitripennis\_33 HDLIKKTQPKHD--VLQSKLSEIFNAL-----MIEPRS---  
Candida\_glabrata\_34 VPATV---NEDD--EFRDAVEDVEAYS-----KLPGT---  
Ixodes\_scapularis\_35 AELLSCPSGPPQAMDLOKLNKEILG-----RISIMP---  
Daphnia\_pulex\_36 QQLVA-SSAKND--VLNNTLNQILT-----RISIMP---  
Tribolium\_castaneum\_37 SELVRRTPQPKHD--VLQNKLNIEFKSL-----SSRGKIF---  
Anopheles\_gambiae\_38 EDLVRRETPKHD--VIQNKLNIEFNLSAE-----RQISASCGV  
EFR3B\_Ciona\_intestin\_39 EQLLSEMOPDPVD-STQKLVSQLLE-----RQISASCGV  
Tetraodon\_nigrovirid\_40 EELAAHCESKAN--LLHDLRLARIFELTIRSGDPHRLAEPPEPALANMCRPPRRPPSP---  
Solenopsis\_invicta\_41 QDLVSKTQPKHD--VLQSKLSEIFNTL-----SVDPRN---

Cryptococcus\_neoform\_0 -----KGIVVNRVKSASASE-----EARTSTGDENGLGMSGM  
Drosophila\_melanogas\_1 -----TQSDTKSSQLQASNEK-----PIYETNF-----  
EFR3A\_Equus\_caballus\_2 -----SGTLTITSGHAQYQSV-----PVYEMKF-----  
Neurospora\_crassa\_3 -----GEESVNVGAGGQEGSN-----GAAGNLG-VPISRITTSR  
Debaryomyces\_hanseni\_4 -----AFNEHYNSD-----TTPGSIL-----  
Saccharomyces\_cerevi\_5 -----SSRGKIF-----  
Ustilago\_maydis\_6 -----VVTSANGSNGTS-----AVAILDSLKVGVEDAS  
Ascaris\_suum\_7 -----NDTNRLENYILREKPK-----NIFELKM-----  
Harpegnathos\_saltato\_8 -----AVPTTGQQTDTKPSQT-----PAYEIHFE-----  
Monodelphis\_domestic\_9 -----SGTLTITSGHAQYQSV-----PVYEMKF-----  
Ailuropoda\_melanolea\_10 -----SGTLTITSGHAQYQSV-----PVYEMKF-----  
Ashbya\_gossypii\_11 -----ASS-----AFRGKLF-----  
Nematostella\_vectens\_12 -----ALSISTVSISSVPGD-----DTFELKF-----  
Acyrtosiphon\_pisum\_13 -----DISNKLSAVETTQPI-----PIYETLF-----  
Culex\_quinquefasciat\_14 LAKLEA-----SAVDGGGAGGKLNQQR-----AVYENNF-----  
Aedes\_aegypti\_15 -----CGNQLMTAAGATVQR-----PIYENNF-----  
Camponotus\_floridanu\_16 -----TVSTTGQQTDAKPSQT-----PSYIEHF-----  
Caenorhabditis\_elega\_17 -----NGEMTRVRDIGRPAKPK-----NLFEIEL-----  
EFR3B\_Homo\_sapiens\_18 -----SGTITAAYGQPQNHSI-----PVYEMKF-----  
EFR3A\_Homo\_sapiens\_19 -----SGTLTITSGHAQYQSV-----PVYEMKF-----  
EFR3B\_Ailuropoda\_mel\_20 -----SGTITAAYGQPQNHSI-----PVYEMKF-----  
Schizosaccharomyces\_21 -----MSPT-----PIQSPPY-----  
EFR3A\_Xenopus\_laevis\_22 -----SGTLTMTAGHAQYQSV-----PVYEMKF-----  
EFR3A-Taeniopygia\_gu\_23 -----SGTMTITAGHAHYHSV-----PVYEMKF-----  
EFR3B\_Danio\_rerio\_24 -----SGTITSSYGQTQSRVS-----PVYEMKF-----  
Anopheles\_darlingi\_25 -----AGSLLGANGGLNGPLIDGGKQLGGVGGQRPIYENNF-----  
EFR3B\_Mus\_musculus\_26 -----SGTISAAYGQPQNHSI-----PVYEMKF-----  
Yarrowia\_lipolytica\_27 -----VSDLKGMAGGNAYVSK-----EPIAQKFD-----  
EFR3A\_Rattus\_norvegicus\_28 -----SGTLTITSGHAQYQSV-----PVYEMKF-----  
Gallus\_gallus\_29 -----SGTMTITAGHAHYQSV-----PVYEMKF-----  
Kluyveromyces\_lactis\_30 -----VSS-----STRGRLF-----  
Ornithorhynchus\_anat\_31 -----SGTLTITSGHAQYQSV-----PVYEMKF-----  
EFR3A\_Oryctolagus\_cu\_32 -----SGTLTITSGHAQYQSV-----PVYEMKF-----  
Nasonia\_vitripennis\_33 -----QSIPGGTSPDAKPSQT-----PAYEIHFE-----  
Candida\_glabrata\_34 -----LATCGGSQKLDVAVSQ-----DLASAPVYEVNF-----  
Ixodes\_scapularis\_35 -----CGQPELTAVQPNNQSM-----PLYGNMF-----  
Daphnia\_pulex\_36 -----SANDRRNPTEKKIEK-----PAYEQNF-----  
Tribolium\_castaneum\_37 -----QAGSLLLAANGGLNGPSMIEPKHHLAAG-----GQRPIYENNF-----  
Anopheles\_gambiae\_38 -----DEDLYVQDY-----DLESMEY-----  
EFR3B\_Ciona\_intestin\_39 -----SGTVSLSAGHGQHSV-----PVYEMKF-----  
Tetraodon\_nigrovirid\_40 -----TVPTTGPQTDTKPSQT-----PAYEIHFE-----  
Solenopsis\_invicta\_41 -----TVPTTGPQTDTKPSQT-----PAYEIHFE-----

Cryptococcus\_neoform\_0 TQGDGATGHKVVTNPPDL-----  
Drosophila\_melanogas\_1 -----PELFY-----  
EFR3A\_Equus\_caballus\_2 -----PDLCV-----  
Neurospora\_crassa\_3 TQPQATTAHTTLPRPSTSSKRSIKSRAGSRAGPMSSSWLGEKPPAMDLAALLKGIDSASI  
Debaryomyces\_hanseni\_4 -----SKQMV-----  
Saccharomyces\_cerevi\_5 -----SST-----  
Ustilago\_maydis\_6 RLGRDTSWSAI---PAKGI-----  
Ascaris\_suum\_7 -----PASFV-----  
Harpegnathos\_saltato\_8 -----PELFV-----  
Monodelphis\_domestic\_9 -----PDLCV-----

|                         |                 |
|-------------------------|-----------------|
| Ailuropoda_melanoleu_10 | -----PDLCV----- |
| Ashbya_gossypii_11      | -----SS-----    |
| Nematostella_vectens_12 | -----PQEYI----- |
| Acyrtosiphon_pisum_13   | -----PELFA----- |
| Culex_quinquefasciat_14 | -----PELFF----- |
| Aedes_aegypti_15        | -----PELFF----- |
| Camponotus_floridanu_16 | -----PELFV----- |
| Caenorhabditis_elega_17 | -----PS-FA----- |
| EFR3B_Homo_sapiens_18   | -----PDLCV----- |
| EFR3A_Homo_sapiens_19   | -----PDLCV----- |
| EFR3B_Ailuropoda_mel_20 | -----PDLCV----- |
| Schizosaccharomyces_21  | -----VRT-----   |
| EFR3A_Xenopus_laevis_22 | -----PDLCV----- |
| EFR3A-Taeniopygia_gu_23 | -----PDLCV----- |
| EFR3B_Danio_rerio_24    | -----PDLCV----- |
| Anopheles_darlingi_25   | -----PELFF----- |
| EFR3B_Mus_musculus_26   | -----PDLCV----- |
| Yarrowia_lipolytica_27  | -----PQTFV----- |
| EFR3A_Rattus_norvegi_28 | -----PDLCV----- |
| Gallus_gallus_29        | -----PDLCV----- |
| Kluyveromyces_lactis_30 | -----M-----     |
| Ornithorhynchus_anat_31 | -----PDLCV----- |
| EFR3A_Oryctolagus_cu_32 | -----PDLCV----- |
| Nasonia_vitripennis_33  | -----PELFV----- |
| Candida_glabrata_34     | -----AN-----    |
| Ixodes_scapularis_35    | -----PELFV----- |
| Daphnia_pulex_36        | -----PDLFV----- |
| Tribolium_castaneum_37  | -----PELFF----- |
| Anopheles_gambiae_38    | -----PELFF----- |
| EFR3B_Ciona_intestin_39 | -----PSIYA----- |
| Tetraodon_nigrovirid_40 | -----PDLCV----- |
| Solenopsis_invicta_41   | -----PELFV----- |

|                         |                                 |
|-------------------------|---------------------------------|
| Cryptococcus_neoform_0  | -----SLGR-PVDVSSSS-----         |
| Drosophila_melanogas_1  | -----Y-----                     |
| EFR3A_Equus_caballus_2  | -----Y-----                     |
| Neurospora_crassa_3     | SDIKSLGAGGKPPY-----             |
| Debaryomyces_hanseni_4  | -----TSD-----IDSILEGLDIDDDSEIIV |
| Saccharomyces_cerevi_5  | -----                           |
| Ustilago_maydis_6       | -----TNGTAPISPPYTS-----         |
| Ascaris_suum_7          | -----Y-----                     |
| Harpegnathos_saltato_8  | -----Y-----                     |
| Monodelphis_domestic_9  | -----Y-----                     |
| Ailuropoda_melanoleu_10 | -----Y-----                     |
| Ashbya_gossypii_11      | -----                           |
| Nematostella_vectens_12 | -----Y-----                     |
| Acyrtosiphon_pisum_13   | -----F-----                     |
| Culex_quinquefasciat_14 | -----Y-----                     |
| Aedes_aegypti_15        | -----Y-----                     |
| Camponotus_floridanu_16 | -----Y-----                     |
| Caenorhabditis_elega_17 | -----Y-----                     |
| EFR3B_Homo_sapiens_18   | -----Y-----                     |
| EFR3A_Homo_sapiens_19   | -----Y-----                     |
| EFR3B_Ailuropoda_mel_20 | -----Y-----                     |
| Schizosaccharomyces_21  | -----                           |
| EFR3A_Xenopus_laevis_22 | -----Y-----                     |
| EFR3A-Taeniopygia_gu_23 | -----Y-----                     |
| EFR3B_Danio_rerio_24    | -----Y-----                     |
| Anopheles_darlingi_25   | -----Y-----                     |
| EFR3B_Mus_musculus_26   | -----Y-----                     |
| Yarrowia_lipolytica_27  | -----NTWTVTDNLGGLTV-----        |
| EFR3A_Rattus_norvegi_28 | -----Y-----                     |
| Gallus_gallus_29        | -----Y-----                     |
| Kluyveromyces_lactis_30 | -----V-----                     |
| Ornithorhynchus_anat_31 | -----Y-----                     |

```

EFR3A_Oryctolagus_cu_32 -----Y-----
Nasonia_vitripennis_33 -----Y-----
Candida_glabrata_34 -----Y-----
Ixodes_scapularis_35 -----F-----
Daphnia_pulex_36 -----Y-----
Tribolium_castaneum_37 -----Y-----
Anopheles_gambiae_38 -----Y-----
EFR3B_Ciona_intestin_39 -----Y-----
Tetraodon_nigrovirid_40 -----Y-----
Solenopsis_invicta_41 -----Y-----

```

**Figure S4.** Multispecies protein sequence alignment of EFR3A/B for ConSurf analysis.
