# Supplementary material for: Rare deleterious mutations of the gene EFR3A in autism spectrum disorders
Source: Mol Autism. 2014 Apr 29;5:31. doi: 10.1186/2040-2392-5-31 (PMC4032628; doi:10.1186/2040-2392-5-31)
Supplement: Additional file 8: Table S3 — Median expression correlation coefficients for ACTB, CHD8, DYRK1A, EFR3A, EFR3B, GRIN2B, KATNAL2, NRXN1, SCN2A, SHANK2 and SHANK3 compared to M12, M16, M2, M3 and all brain-expressed genes. [file 2040-2392-5-31-S8.xlsx]

## Sheet: Sheet1
Table S3. Median expression correlation coefficents based on data from Kang et al 2011
Gene	Compared to M12	Compared to M16	Compared to M2	Compared to M3	Compared to all brain-expressed genes
ACTB	0.0654	0.0558	-0.1341	-0.1001	-0.0093
CHD8	0.0411	0.1186	0.0770	0.1064	0.0137
DYRK1A	-0.1395	-0.0435	0.4846	0.5969	-0.0272
EFR3A	0.4626	0.4053	-0.4355	-0.5148	-0.0246
EFR3B	0.1700	0.2289	0.0554	0.0203	-0.0064
GRIN2B	0.0999	0.1893	0.3069	0.1831	-0.0239
KATNAL2	0.1658	0.0468	-0.5263	-0.6051	0.0140
NRXN1	0.1827	0.3049	0.1850	0.1218	-0.0080
SCN2A	0.3400	0.3556	-0.2383	-0.3733	-0.0090
SHANK2	0.1396	0.1890	-0.0660	-0.2442	-0.0220
SHANK3	0.3371	0.2304	-0.4940	-0.6540	-0.0104
