# Supplementary material for: Rare deleterious mutations of the gene EFR3A in autism spectrum disorders
Source: Mol Autism. 2014 Apr 29;5:31. doi: 10.1186/2040-2392-5-31 (PMC4032628; doi:10.1186/2040-2392-5-31)
Supplement: Additional file 10: Table S5 — All rare nonsynonymous CASK variants in SSC cases. [file 2040-2392-5-31-S10.xlsx]

## Sheet: Sheet1
Table S5. All rare nonsynonymous CASK variants in SSC cases (n=705)
Exon	Zygosity	Amino acid change	Chr	hg19	Reference	Variant	ID	Sex	Father	Mother	Sibling
5	heterozygous	V142M	X	41598642	C	T	12648.p1	F	-	+	+ F
7	heterozygous	G197R (from exome)	X	41524649	C	T	11379.p1	F	-	-	- F
12	hemizygous	S364G	X	41469222	T	C	11291.p1	M	-	+	+ F
