# Supplementary material for: Rare deleterious mutations of the gene EFR3A in autism spectrum disorders
Source: Mol Autism. 2014 Apr 29;5:31. doi: 10.1186/2040-2392-5-31 (PMC4032628; doi:10.1186/2040-2392-5-31)
Supplement: Additional file 14: Table S9 — Top 100 genes co-expressed with EFR3A. [file 2040-2392-5-31-S14.xlsx]

## Sheet: Sheet1
Table S9. Top 100 genes co-expressed with EFR3A
Correlationa	Probe_ID	Gene
0.871833	2520291	GLS
0.867083	2838416	GABRA1
0.866734	2475911	EHD3
0.866436	2317434	TPRG1L
0.863489	3901191	NAPB
0.862062	3608638	SV2B
0.860253	2924514	NCOA7
0.860122	2600068	TUBA4A
0.857454	3888055	ARFGEF2
0.855147	2955673	ENPP5
0.852369	3294438	ANXA7
0.85045	2890605	MAPK9
0.844391	3110999	OXR1
0.842922	3302990	GOT1
0.842363	2366422	ATP1B1
0.842314	3110171	ATP6V1C1
0.840566	3603199	IDH3A
0.837929	3455973	SPRYD3
0.835553	3724197	NSF
0.835444	2705748	NCEH1
0.834485	3929325	SYNJ1
0.832941	3033127	HTR5A
0.832519	2550959	PREPL
0.832474	4012511	NAP1L2
0.832434	2318086	KCNAB2
0.829028	2884845	GABRB2
0.827934	3991698	HPRT1
0.827221	2859775	SGTB
0.826877	3141857	TPD52
0.826514	3190242	DNM1
0.826189	2997907	EPDR1
0.82599	3727583	HLF
0.825234	2587961	CHN1
0.824765	3404636	GABARAPL1
0.824458	3352948	SORL1
0.823447	3963115	SULT4A1
0.823352	2376548	MFSD4
0.822539	3184896	ZNF483
0.822336	3876245	SNAP25
0.821541	2353477	ATP1A1
0.8206	2471233	VSNL1
0.820499	2610972	SYN2
0.819777	2705030	SLC7A14
0.819421	3333942	RTN3
0.818601	3803120	B4GALT6
0.818118	2343170	CCDC55
0.817792	3970214	REPS2
0.817695	3721989	CNTNAP1
0.81637	3094778	TACC1
0.814607	3495076	NDFIP2
0.814017	2833286	ARHGAP26
0.813597	3358742	TOLLIP
0.812759	4004819	DYNLT3
0.812747	3710870	RICH2
0.812578	3961023	CBX7
0.812553	2910477	FBXO9
0.812301	3063035	TMEM130
0.811616	3887241	SLC12A5
0.810625	3210497	PRUNE2
0.8103	2749191	GLRB
0.809781	2951221	C6orf106
0.80976	2485176	MDH1
0.809673	2838462	GABRG2
0.809115	2608765	ARL8B
0.809014	3432394	RPH3A
0.808655	3454157	FAIM2
0.808494	3396003	SIAE
0.807754	4007126	SYN1
0.807363	3214227	DIRAS2
0.807022	3146012	NIPAL2
0.80634	2364155	UHMK1
0.806307	3722872	RUNDC3A
0.80596	3088544	ATP6V1B2
0.805812	2512790	SLC4A10
0.804676	2914693	SH3BGRL2
0.803948	3402697	COPS7A
0.803516	3591459	MAP1A
0.801706	3378228	B3GNT1
0.801523	3362159	NRIP3
0.800874	3011861	STEAP2
0.800765	3697015	AARS
0.800653	2706791	ZMAT3
0.800058	3302495	AVPI1
0.798868	2742935	HSPA4L
0.798651	3679812	GRIN2A
0.798148	3127352	LGI3
0.796432	2993727	SNX10
0.796137	3624273	LYSMD2
0.795806	3710681	MAP2K4
0.795732	2874920	ACSL6
0.795727	3758615	DUSP3
0.794826	3778823	NAPG
0.794716	2955691	RCAN2
0.793375	2831567	PURA
0.793215	3672059	KIAA0513
0.793008	3995666	ATP2B3
0.792861	3756386	KRT222
0.792733	3094514	DDHD2
0.792432	3591327	CCNDBP1
0.791301	2696040	RAB6B
aExpression correlation coefficients are from Kang et al 2011.
